24 **Abstract**

25 Assessing the duration of humoral and cellular immunity remains key to overcome the current  
26 SARS-CoV-2 pandemic, especially in understudied populations in least developed countries.  
27 Sixty-four Cambodian individuals with laboratory-confirmed infection with asymptomatic or  
28 mild/moderate clinical presentation were evaluated for humoral immune response to the viral  
29 spike protein and antibody effector functions during acute phase of infection and at 6-9 months  
30 follow-up. Antigen-specific B cells, CD4<sup>+</sup> and CD8<sup>+</sup> T cells were characterized, and T cells  
31 were interrogated for functionality at late convalescence. Anti-spike (S) antibody titers  
32 decreased over time, but effector functions mediated by S-specific antibodies remained stable.  
33 S- and nucleocapsid (N)-specific B cells could be detected in late convalescence in the activated  
34 memory B cell compartment and are mostly IgG<sup>+</sup>. CD4<sup>+</sup> and CD8<sup>+</sup> T cell immunity was  
35 maintained to S and membrane (M) protein. Asymptomatic infection resulted in decreased  
36 ADCC and frequency of SARS-CoV-2-specific CD4<sup>+</sup> T cells at late convalescence. Whereas  
37 anti-S antibodies correlated with S-specific B cells, there was no correlation between T cell  
38 response and humoral immunity. Hence, all aspects of a protective immune response are  
39 maintained up to nine months after SARS-CoV-2 infection in the absence of re-infection.

40

41

42

43 **One sentence summary**

44 Functional immune memory to SARS-CoV-2, consisting of polyfunctional antibodies, memory  
45 B cells and memory T cells are maintained up to nine months in a South-East Asian cohort in  
46 the absence of re-infection.

## 47 **Introduction**

48           In December 2019, a cluster of severe pneumonia of unknown cause was reported to the  
49 World Health Organization. Investigation into the etiology revealed a novel betacoronavirus,  
50 subsequently named Severe Acute Respiratory Syndrome Coronavirus 2 (SARS-CoV-2), the  
51 causative agent of Coronavirus Disease 2019 (COVID-19) (1). Clinical spectrum of COVID-  
52 19 ranges from asymptomatic, over mild upper respiratory tract illness, to severe viral  
53 pneumonia resulting in respiratory failure and death (1-3).

54           Upon infection with SARS-CoV-2, humans generate SARS-CoV-2-specific antibodies,  
55 memory B cells, and CD4<sup>+</sup> and CD8<sup>+</sup> T cells, which all have complementary functions in the  
56 clearance of SARS-CoV-2 virions and infected cells (4). Mainly structural proteins are targeted  
57 by the immune response, such as the membrane (M) and spike (S) protein integrated in the  
58 virion envelope, and the nucleoprotein (N), which protects the RNA genome (5-7). The S  
59 protein consists of two domains. The S1 region contains the receptor binding domain (RBD)  
60 which interacts with the host protein Angiotensin-converting enzyme 2 (ACE2) to mediate cell  
61 entry, whereas the S2 domain mediates membrane fusion. The S1 domain with the RBD is a  
62 major target of neutralizing antibodies (8, 9). Several studies show correlation between  
63 antibodies targeting S and functional neutralization (10-12). In animal models, these  
64 neutralizing antibodies are protective against secondary infection (13, 14). In humans, anti-S  
65 antibodies and neutralizing antibodies can be detected up to one year post infection (15-17).

66           Besides neutralization, antibodies activate a variety of effector functions mediated by  
67 their Fc domain. These include complement activation, killing of infected cells and  
68 phagocytosis of viral particles (18). Indeed, it has been shown that symptomatic and  
69 asymptomatic SARS-CoV-2 infection elicit polyfunctional antibodies targeting infected cells

70 (19, 20) and Fc mediated effector activity of antibodies correlates with reduced disease severity  
71 and mortality after SARS-CoV-2 infection (21). However, the evolution of this response over  
72 time requires further investigation (22, 23).

73 Persistence of serum antibodies may not be the sole determinant of long-lasting  
74 immunity post infection or vaccination. Anamnestic recall of memory T and B cell populations  
75 can also reduce infection or disease at re-exposure (24-26), with increasing importance as  
76 antibody titers wane. Virus-specific memory T and B cells can be detected in at least 50% of  
77 the individuals six months post infection (24, 26, 27). Several studies suggest that increased  
78 severity of COVID-19 induces a stronger SARS-CoV-2-specific CD4<sup>+</sup> T cell response (27-29).  
79 However, the magnitude, quality, and protective capacity of cellular responses against SARS-  
80 CoV-2 requires further definition (4).

81 Kinetics and duration of the memory immune responses could depend on a number of  
82 factors including viremia, disease severity, re-infection, cross-reactivity with human seasonal  
83 coronaviruses (hCoVs), ethnic background, and age (reviewed in (4)). Other human  
84 betacoronaviruses, such as hCoV OC43 and HKU1, and zoonotic viruses, such as SARS-CoV-1  
85 and Middle East respiratory syndrome-related coronavirus (MERS-CoV), show waning  
86 antibody levels as soon as three months post infection. In contrast, T cell responses are  
87 detectable up to 17 years later (30, 31).

88 Most studies analyzing the evolution of the adaptive immune response to SARS-CoV-  
89 2 are conducted in Caucasian populations (4). In South-East Asia, very few studies have been  
90 performed, which mainly focused on antibody responses (16, 32-34). Understanding long-term  
91 immunity after natural infection by determining the frequency, function, and specificities of the

92 humoral and cellular immune components in various populations is critical. Paucity of data  
93 from at risk areas and populations can hamper global mitigation and vaccination efforts.

94 We comprehensively characterized long-lived immunity in 64 Cambodian individuals  
95 with laboratory-confirmed infection experiencing mild/moderate or asymptomatic clinical  
96 outcome. Cambodia remained almost completely COVID-19-free in 2020 (35), hence,  
97 additional exposure to SARS-CoV-2 in this cohort is highly unlikely. The humoral immune  
98 response to the viral spike protein was assessed and antibody effector functions were  
99 characterized during the acute phase of infection and up to nine months later. In addition, at late  
100 convalescence, persistence and phenotype of S1- and N-specific memory B cells was evaluated.  
101 Virus-specific CD4<sup>+</sup> and CD8<sup>+</sup> T cells were characterized and T cells were interrogated for  
102 functionality.

103

## 104 **Results**

### 105 *Long-term follow-up of SARS-CoV-2 imported cases*

106 Sixty-four individuals with confirmed SARS-CoV-2 were included and re-assessed 6-9 months  
107 after infection. SARS-CoV-2 infection was confirmed by positive molecular diagnosis as part  
108 of the national surveillance system. Since Cambodia had minimal detection of SARS-CoV-2  
109 during the follow-up period, the probability of re-exposure to SARS-CoV-2 was minimal (35)  
110 in 2020 . For 33 individuals, we obtained a blood sample 2-9 days after laboratory confirmed  
111 infection (Figure S1A). For all 64 study participants, between 1 to 15 follow-up  
112 nasopharyngeal/oropharyngeal (NP/OP) swab samplings assessed the duration of viremia  
113 during the acute phase of infection via RT-PCR (36). Based on the duration of viremia, 53% of  
114 individuals were considered “long shedders” with detection of viral RNA in NP/OP swabs for

115  $\geq 10$  days (Figure S1B). Overall, 70% of the patients displayed mild or moderate symptoms,  
116 and 30% remained asymptomatic (Table S1). For all assays, samples were selected based on  
117 availability and quality.

118 *Asymptomatic and mild/moderate infection induces a persisting anti-spike antibody response.*

119 The presence of S-binding antibodies was measured using the S-Flow assay, which sensitively  
120 and quantitatively measures anti-S IgG, IgA, and IgM by flow cytometry (19, 37) (Figure 1A).

121 The National Institute for Biological Standards and Control (NIBSC) references were utilized  
122 to validate the assays and pre-pandemic samples obtained from nineteen individuals were  
123 measured to set the cutoff for each assay (Figure S2). Anti-S IgM, IgG, and IgA titers decreased  
124 significantly between acute phase and late convalescence ( $p=0.02$ ,  $p<0.0001$ ,  $p<0.0001$ ,

125 respectively). (Figure 1B). Within the total S-binding antibodies, the percentage of anti-S IgM

126 and IgA decreased whereas anti-S IgG increased over time ( $p=0.0003$ , Figure 1C). The

127 detection of neutralizing antibodies was achieved by foci reduction neutralization test using a

128 Cambodian SARS-CoV-2 isolate. There was no difference in the titers of SARS-CoV-2

129 neutralizing antibodies between the acute and convalescent phase, even though titers tended to

130 decrease over time (Figure 1D). Over time, the percentage of individuals positive for anti-S

131 IgM ( $p<0.0001$ ) and anti-S IgA ( $p<0.0001$ ) decreased (Figure 1E). In the acute phase, 91% of

132 individuals were positive for anti-S IgG, and only 70% of the individuals were positive for

133 neutralizing antibody titers. Up to nine months post infection, the frequency of individuals

134 positive for anti-S IgG remained stable (88%) whereas the frequency of individuals with

135 neutralizing titers decreased to 56% ( $p=0.055$ ) (Figure 1E). Analyzing only individuals with

136 paired samples available, revealed similar results as the whole cohort (Figure S3, A-B). Taken

137 together, these data show that despite decreases in antibody titers over time, the percentage of  
138 individuals positive for anti-S IgG remains stable.

139 *Functional antibody response changes over time post SARS-CoV-2 infection*

140 Besides neutralization, antibodies can mediate Fc-effector functions, such as complement  
141 activation, killing of virus-infected cells and phagocytosis of viral particles (18). To further  
142 define the humoral response in these individuals, we assessed antibody effector functions *in*  
143 *vitro*. The NIBSC references were utilized to validate the assays and nineteen pre-pandemic  
144 samples were measured to set the cutoff for each assay. Antibody-dependent cellular  
145 phagocytosis (ADCP) assay measures the engulfment of neutravidin beads coated with SARS-  
146 CoV-2 derived S1 by THP-1 cells (Figure 2A, S4). A decrease in ADCP can be observed  
147 between the acute and late convalescent phase ( $p=0.005$ , Figure 2B, C). The percentage of  
148 subjects with ADCP activity decreased from 73% to 55% over time. However, when calculating  
149 the proportion of ADCP within the total anti-S antibodies, we observed a significant increase  
150 of the proportion of ADCP over time ( $p=0.003$ , Figure 2D).

151 Next, to evaluate the contribution of anti-S antibodies to complement dependent  
152 cytotoxicity (CDC), we assessed cell death in Raji cells engineered to express S protein in the  
153 presence of normal human serum as source of complement (Figure 2E, S5) (19). No differences  
154 in CDC activity was observed between the acute and late convalescent phase, where 60% and  
155 56% of the subjects showed CDC activity, respectively (Figure 2F, G). The proportion of CDC-  
156 mediating antibodies within the total anti-S antibody fraction significantly increased between  
157 acute and late convalescence ( $p=0.0002$ , Figure 2H).

158 Killing of virus-infected cells can also be mediated by activated NK cells, after binding  
159 of immunocomplexes to CD16 (18). Therefore, antibody-dependent cellular cytotoxicity

160 (ADCC) activity was measured using S-expressing 293T cells as target cells with degranulation  
161 measured by CD107a staining in primary NK cells as a readout for ADCC (Figure 2I, Figure  
162 S6). ADCC activity did not change between the acute and late convalescent phase (Figure 2J,  
163 K). At both time points, 59% - 66% of individuals showed anti-S mediated ADCC activity.  
164 However, similar to ADCP and CDC, the proportion of ADCC-mediating antibodies within the  
165 fraction of anti-S antibodies increased significantly over time ( $p < 0.0001$ , Figure 2I). Analyzing  
166 only individuals with paired samples available, revealed similar results as the cohort as a whole  
167 (Figure S3, C-H). Overall, these data show that antibody effector functions mediated by S-  
168 specific antibodies remain stable over time and that the proportion of the functional antibody  
169 response within the total anti-S antibodies increases over time.

170

171 *SARS-COV-2 infection induces a sustained memory B cell compartment reacting against*  
172 *spike and nucleocapsid protein 6-9 months after infection*

173 Upon re-infection, memory B cells are rapidly activated to differentiate into antibody-producing  
174 plasmablasts and/or re-initiate germinal centers in the case of secondary heterologous infection  
175 with antigenically similar pathogens (38). Therefore, they may play an important role in long-  
176 term immunity to SARS-CoV-2 and their evolving variants. We assessed the phenotype and  
177 frequency of antigen-specific memory B cells by staining with site-specific biotinylated  
178 recombinant S1 and N protein (Figure 3A, S7A, B). At late convalescence, 0.10% of the total  
179 CD27<sup>+</sup> B cells are S1-specific, whereas 0.66% are N-specific ( $p < 0.0001$ , Figure 3B). (Figure  
180 3C, D). The proportion of CD27<sup>+</sup>CD38<sup>+</sup> S1-specific B cells (75%, IQR=30%) is significantly  
181 increased compared to the proportion of CD27<sup>+</sup>CD38<sup>+</sup> N-specific B cells (39%, IQR=26%,  
182 Mann-Whitney Test,  $p < 0.0001$ ) (Figure 3E). Moreover, the proportion of S1- versus N-specific



183 B cells varies within each CD27<sup>+</sup> B cell subset ( $p < 0.0001$ , Figure 3F). We next analyzed S1-  
184 and N-specific B cells within the unswitched (IgD<sup>-</sup>IgM<sup>+</sup>) and switched (IgD<sup>-</sup>IgG<sup>+</sup> and IgD<sup>-</sup>IgA<sup>+</sup>)  
185 B cell compartments (Figure S7A). S1-specific B cells were mainly IgD<sup>-</sup>IgG<sup>+</sup>, whereas N-  
186 specific B cells were either IgD<sup>-</sup>IgM<sup>+</sup> or IgD<sup>-</sup>IgG<sup>+</sup> (Figure 3G,H). The proportion of IgD<sup>-</sup>IgG<sup>+</sup>  
187 S1-specific B cells (75%, IQR=24%) was significantly increased compared to the proportion  
188 of IgD<sup>-</sup>IgG<sup>+</sup> N-specific B cells (37%, IQR=17%) ( $p < 0.0001$ ) (Figure 3I). Therefore, within each  
189 switched B cell subset, the proportion of S1- versus N-specific B cells was different ( $p < 0.0001$ )  
190 (Figure 3J). Taken together, SARS-CoV-2 infection induces a robust memory B cell response  
191 targeting both S and N.

192

193 *SARS-CoV-2 infection induces mainly spike and membrane protein-specific memory CD4<sup>+</sup> and*  
194 *CD8<sup>+</sup> T cells that are maintained up to 6-9 months after infection.*

195 In addition to humoral immunity, the generation and maintenance of virus-specific cellular  
196 immune responses is critical to help prevent reinfection. Long-term maintenance and  
197 phenotypes of SARS-CoV-2-specific memory T cell responses are still under investigation (24,  
198 39, 40). SARS-CoV-2-specific CD4<sup>+</sup> and CD8<sup>+</sup> T cells were assessed in 33 individuals at late  
199 convalescence by incubating PBMCs with peptide pools covering immunodominant sequences  
200 of the viral S1, M and N protein (Figure 4A). Post incubation, activation induced marker (AIM)  
201 assays identified CD4<sup>+</sup> antigen-specific cells using OX40<sup>+</sup>CD137<sup>+</sup> combined with phenotypic  
202 markers to measure different memory and T helper (Th) subsets (Figure S8 A-D). Percentages  
203 of both S1- and M-specific CD4<sup>+</sup> T cells were significantly increased compared to the  
204 percentage of N-specific cells ( $p < 0.0001$ ,  $p = 0.0002$ ), Figure 4B). Phenotypically, 42% of virus-  
205 specific T cells displayed an effector memory phenotype (CD45RA<sup>-</sup>CCR7<sup>+</sup>) and 87% of the

206 cells showed a Th1-skewed phenotype (CXCR3<sup>+</sup>CCR6<sup>-</sup>) (Figure 4C, D). Comparing the  
207 memory phenotype of S1-, M- and N-specific cells, we observed that a lower proportion of S1-  
208 specific cells displayed an effector memory phenotype (23%) compared to M-specific cells  
209 (41%,  $p=0.0457$ ) and N-specific cells (58%,  $p<0.0001$ ) (Figure S9A). Moreover, 97% of M-  
210 specific cells showed a Th1-skewed phenotype compared to only 65% ( $p<0.0001$ ) of the S1-  
211 specific cells and 71% ( $p=0.0130$ ) of the N-specific cells (Figure S9B). In eight individuals,  
212 sufficient cell numbers were available to assess functionality by cytokine production after  
213 peptide stimulation using a multi-parameter *ex vivo* intracellular cytokine staining (ICS) assay  
214 (Figure S8E). SARS-CoV-2-specific CD4<sup>+</sup> T cells produced Interleukin (IL)-2 (36%) or IL-6  
215 (28%) after peptide stimulation, and were polyfunctional (Figure 4 E, F). Percentages of IL-2<sup>+</sup>  
216 and IL-17<sup>+</sup> cells were significantly higher after S1 stimulation compared to M stimulation  
217 ( $p=0.046$ ,  $p=0.017$ ) (Figure S9C).

218 Next, we assessed the frequency and phenotype of cytotoxic CD8<sup>+</sup> T cells by AIM assay  
219 using CD69<sup>+</sup>CD137<sup>+</sup> to identify antigen-specific CD8<sup>+</sup> T cells. Frequency of total SARS-CoV-  
220 2-specific CD8<sup>+</sup> cells is 0.44% (Figure 5A) with 61% of these SARS-CoV-2-specific CD8<sup>+</sup> T  
221 cells being terminally differentiated effector memory cells (TEMRA, CD45RA<sup>+</sup>CCR7<sup>-</sup>) (Figure  
222 5B, Figure S9D). No differences were observed between S1-, M- and N-specific CD8<sup>+</sup> T cells.  
223 Similar to antigen-specific CD4<sup>+</sup> T cells, SARS-CoV-2-specific CD8<sup>+</sup> T cells produced either  
224 IL-2 (56%) or IL-6 (16%) after peptide stimulation, and were polyfunctional (Figure 5 C, D),  
225 (Figure S9E). Interestingly, 2/33 (6%) individuals displayed no CD4<sup>+</sup> T cell reactivity, and 6/33  
226 (19%) individuals lacked a CD8<sup>+</sup> T cell response after stimulation. In summary, sustained and  
227 functional CD4<sup>+</sup> and CD8<sup>+</sup> T cell responses are detected in the study participants, even after  
228 experiencing only mild or asymptomatic SARS-CoV-2 infection. These data suggest that

229 SARS-CoV-2 can induce a long-lived cellular immune response, which could confer protection  
230 after reinfection or could be reactivated with vaccination.

231 *Symptomatic infection is associated with increased ADCC activity and increased frequency of*  
232 *SARS-CoV-2-specific CD4<sup>+</sup> T cells observed 6-9 months after infection.*

233 In order to assess if symptomatic disease is associated to altered immune memory formation,  
234 we compared the functional immune response between asymptomatic and symptomatic patients  
235 with mild/moderate clinical presentation. Overall, no differences occurred in the humoral  
236 parameters assessed in the acute phase of infection (Figure 6A, S10). At late convalescence,  
237 symptomatic disease is associated with increased ADCC activity compared to asymptomatic  
238 individuals (p=0.0034) (Figure 6A). Moreover, percentages of N-specific CD27<sup>+</sup> B cells, but  
239 not S1-specific, were increased in asymptomatic individuals versus patients who were  
240 symptomatic (p=0.051) (Figure 6B). Symptomatic disease was also significantly associated  
241 with increased percentage of SARS-CoV-2-specific CD4<sup>+</sup> T cells (p=0.0018) with a central  
242 memory phenotype (p=0.0498) (Figure 6C, D). These data suggest that the outcome of acute  
243 infection has an imprint on the memory immune response with implications for response to  
244 subsequent infection or vaccination.

245 *Correlations between various aspects of the functional anti-viral memory response*

246 In order to assess the relation between antibody titers, functional humoral immunity, and the  
247 cellular T and B cell compartment we performed extensive correlation analysis (Figure 7). Age  
248 correlated to anti-S antibody titers and S1-specific CD19<sup>+</sup>IgD<sup>-</sup>IgG<sup>+</sup> and CD19<sup>+</sup>CD27<sup>+</sup>B cells.  
249 In the acute phase of infection, anti-S IgG, IgM and IgA titers, functionality, measured by  
250 seroneutralization, and effector functions correlated. Seroneutralization, anti-S IgA, and ADCC  
251 correlated over time, albeit not very strong. Antibody effector functions 2-9 days post

252 laboratory confirmation negatively correlated with total antigen-specific and S1-specific CD4<sup>+</sup>  
253 T cells at late convalescence.

254 At late convalescence, anti-S IgG correlated with all three effector functions, but not  
255 with neutralizing capacity. Within the B cell compartment, N-specific IgG<sup>+</sup>, IgA<sup>+</sup> and CD27<sup>+</sup>  
256 B cells correlated to one another, as did S1-specific IgG<sup>+</sup>, IgA<sup>+</sup> and CD27<sup>+</sup> B cells. No  
257 correlation was identified between S1- and N-specific B cells. Anti-S IgG titers, ADCP, and  
258 CDC correlated with S1-specific IgG<sup>+</sup> and CD27<sup>+</sup> B cells. The S1-specific CD4<sup>+</sup> T cell  
259 responses correlated with S1-specific CD8<sup>+</sup> T cell responses, but did not correlate to antibody  
260 titers nor to effector functions or to S1-specific B cells. Overall, different aspects of a functional  
261 immune memory response do not fully correlate with one another and require separate  
262 evaluation when considering long-term immunity to SARS-CoV-2.

263

## 264 **Discussion**

265 In this study, we investigated a partially asymptomatic cohort of Cambodian individuals  
266 in the acute and late convalescent phase for anti-S antibody titers, neutralization and effector  
267 functions, as well as SARS-CoV-2-specific B and T cell responses. As Cambodia was relatively  
268 COVID-19-free throughout 2020 (35), it is highly unlikely this cohort had additional exposure  
269 events after inclusion in this study, that could have boosted their immunity to SARS-CoV-2.  
270 One limitation is the uncertainty of the exact timing of exposure/infection, as infections were  
271 identified by screening at entry into Cambodia rather than in a direct surveillance or community  
272 cohort.

273 Studies assessing long-term immunity to SARS-CoV-2 in Asian populations are scarce  
274 (16, 32-34, 41). In addition, studies on cross-reactivity of the humoral and cellular compartment

275 with other hCoVs have mainly focused on European and US populations (42-45). Historically,  
276 the population in East Asia seems to be more exposed to coronavirus-like viruses as only East  
277 Asian population show genetic adaptation to coronaviruses (46). The main natural reservoir of  
278 SARS-related coronaviruses is believed to be Horseshoe bats (genus *Rhinolophus*), which are  
279 endemic to Southeast Asia and China (47-49). Whether possible cross-reactivity to other  
280 coronavirus-like viruses or hCoVs may have influenced the adaptive immune response to  
281 SARS-CoV-2 in Southeast Asian populations remained to be investigated.

282 As expected, anti-S IgM, IgG and IgA titers declined over time and anti-S IgG becomes  
283 the major isotype at late convalescence (24, 50-52). In this study, IgA titers were the most  
284 affected over time. The formation of anti-S IgA is shown to be dependent on local lung  
285 inflammation (53-55) hence titers decline the strongest in asymptomatic/mild patients. Titers  
286 of neutralizing antibodies are reported to reach their maximum within the first month after  
287 infection and then decay, but mostly remain detectable six months and even up to one year after  
288 infection (10, 24). A relatively low rate of individuals retained neutralizing antibodies at late  
289 convalescence in this cohort (56%) as most longitudinal studies found 76-98% of individuals  
290 remaining positive (19, 24). This might be attributed to the absence of possible re-exposure  
291 and/or the consequence of asymptomatic/mild infection (10, 26, 39, 51). In contrast with other  
292 papers, neutralizing titers did not correlate to anti-S IgG antibodies at late convalescence. This  
293 might be due to varying relative contribution of anti-S IgG, IgM and IgA to SARS-CoV-2  
294 neutralization at late convalescence, the genetic background of the participants or can be due to  
295 the different technique to measure anti-S binding and neutralizing antibodies (56, 57).

296 Fc-mediated effector functions contribute to clearance of virus-infected cells but are  
297 often critically overlooked. SARS-CoV-2 infection induces Fc-mediated effector functions

298 irrespective of disease outcome (19-21). Antibody effector functions develop rapidly after  
299 infection and correlate with anti-S IgG and neutralizing titers in the acute phase and at late  
300 convalescence (19, 20). In this current study, between 55-66% of individuals showed antibody  
301 effector function activity up to nine months after infection. Also, ADCC persisted in a higher  
302 percentage of individuals compared to neutralization or other effector functions (22, 23). We  
303 report here the maintenance of CDC over time suggesting that both ADCC and CDC can  
304 contribute to protection from re-infection. ADCP levels decreased over time which could have  
305 consequences for antigen presentation and macrophage activation upon re-infection (58).  
306 Interestingly, the ratio of S-mediated effector functions over total anti-S IgG increases over  
307 time. Together with reports showing the evolution of the BCR repertoire over time (26, 59, 60),  
308 these data indicate ongoing affinity maturation and evolution of the antibody response to a more  
309 functional response. Therefore, measurement of only S-binding antibodies at late  
310 convalescence does not reflect their function.

311 S-, RBD- and N-specific memory B cells are maintained more than six months post  
312 symptom onset and their frequency increased over time (24, 61, 62). In this cohort, S1-and N-  
313 specific memory B cells persisted up to 6-9 months post infection with some variability between  
314 individuals. The percentage of S1-specific IgG B cells correlated with S-specific IgG  
315 antibodies, and S1-specific B cells displayed an activated phenotype. This suggests that these  
316 B cells could be recruited after secondary exposure with SARS-CoV-2 and might confer some  
317 level of protection against infection with new variants via additional diversification through  
318 germinal center responses (38).

319 Anti-SARS-CoV-2 T cell immunity was assessed by AIM, which is a sensitive assay  
320 that provides a broader picture of the overall antigen-specific T cell response, compared to

321 cytokine-detection based assays (6, 63). Persistence of functional memory T cells after SARS-  
322 CoV-2 infection has been reported, also after asymptomatic infection (24, 64). Similar to other  
323 reports, virus-specific memory CD4<sup>+</sup> T cells were skewed to a Th1 or Th1/Th17 profile and  
324 displayed mainly an effector memory (CD45RA<sup>-</sup>CCR7<sup>-</sup>) phenotype (27, 64, 65). Virus-specific  
325 CD8<sup>+</sup> T cells consisted mostly of cells with a TEMRA phenotype, a compartment of cytotoxic  
326 CD8<sup>+</sup> T with limited proliferative potential (66). Polyfunctional virus-specific CD4<sup>+</sup> and CD8<sup>+</sup>  
327 T cells could be detected, mainly secreting IL-2 (16, 39), albeit we could only include few  
328 individuals in this analysis. Similar to other long-term cohorts, virus-specific CD4<sup>+</sup> and CD8<sup>+</sup>  
329 cells can be detected in up to 90% - 70% of the individuals, respectively (4).

330 Differences in frequency and phenotype of N- and S-specific B and T cells has been  
331 reported before (24, 27, 39, 67). This might be due to the difference in antigen availability,  
332 persistence, and immunological context. Together with other envelope proteins, S proteins  
333 cover the surface of the virus and bind to the host cell, while the N protein underlies viral  
334 packaging and hence is less accessible (68). The N protein is more conserved among  
335 coronaviruses (68), whereas S protein and especially the RBD-bearing S1 subunit are more  
336 prone for acquiring mutations (69, 70). Consequently, anti-N IgG rather than anti-S1 IgG can  
337 be found in individuals not exposed to SARS-CoV-2 (68, 71, 72). This might explain the  
338 observed higher frequency of N-specific B cells in our study.

339 Correlations between CD4<sup>+</sup> T cells and humoral responses can be observed in some  
340 long-term cohorts (27, 29, 73, 74) but not all (24). In this study, there was no correlation  
341 between the S-specific cellular and humoral immune compartment at late convalescence.  
342 Therefore, neither anti-S IgG nor neutralizing antibodies are a good proxy to determine the  
343 cellular response to SARS-CoV-2. Moreover, correlations between anti-S antibody titers and

344 Fc-related functions at late convalescence are weak and subtle differences might lead to a  
345 different disease outcome upon re-exposure. Hence, serological testing alone might not be  
346 sufficient to understand the full spectrum of long-term immunity generated after SARS-CoV-2  
347 infection.

348         The development, characteristics and functionality of the totality of long-term immunity  
349 in asymptomatic infected individuals remains to be further characterized. We observed an  
350 increase of ADCC at late convalescence in patients who had mild/moderate disease compared  
351 to asymptomatic individuals. This observation is in line with studies showing increased anti-S  
352 IgG afucosylation in severe patients compared to mild and asymptomatic cases (75, 76). Indeed,  
353 afucosylated monoclonal antibodies can cause elevated ADCC though increased IgG-FcγRIIIa  
354 affinity (77, 78). More severe COVID-19 induced a stronger SARS-CoV-2-specific CD4<sup>+</sup> T  
355 cell response (27-29). We confirm and extend these data as we observed lower levels of virus-  
356 specific CD4<sup>+</sup> T cells in asymptomatic individuals compared to mild/moderate cases. These  
357 data suggest that different disease outcome after infection results in altered long-term immunity,  
358 which could shape the response to subsequent infection or vaccination.

359         Taken together, our work shows additional evidence of long-term and persistent  
360 immunity after asymptomatic and mild SARS-CoV-2 infection. Furthermore, this cohort  
361 describes the immune response in individuals of Asian origin and in the absence of re-exposure  
362 to SARS-CoV-2. We show the persistence of humoral immunity, antibody effector functions,  
363 and virus-specific memory T and B cells 6-9 months after infection, which do not correlate to  
364 each other. These data enhance our understanding of long-term functional immunity.

365

366



367 **Methods**

368 *Study population*

369 Ethical approval for the study was obtained from the National Ethics Committee of Health  
370 Research of Cambodia. Written informed consent was obtained from all participants prior to  
371 inclusion in the study. Pre-pandemic blood samples were obtained from clinically healthy  
372 individuals included in the dengue vaccine initiative study in 2015-2016. Clinically healthy  
373 adult volunteers who presented at the International Vaccination Centre, Institut Pasteur du  
374 Cambodge before the onset of the pandemic were included to validate the antigen-specific B  
375 and T cell staining. Acute SARS-CoV-2 infected patients were identified via screening of  
376 imported cases in Cambodia between 6<sup>th</sup> March to 12<sup>th</sup> August 2020. All laboratory confirmed  
377 cases are quarantined and monitored for symptoms. Moreover, 1-15 follow-up  
378 nasopharyngeal/oropharyngeal swab samplings for SARS-CoV-2 detection were conducted to  
379 assess viremia. Patients were only discharged after two consecutive negative RT-PCR tests  
380 within 48h. Symptomatic patients displayed mild/moderate symptoms such as running nose,  
381 cough, fever and difficult to breath. In total, we included 64 individuals for follow up. In 33  
382 individuals, 2-9 days after laboratory confirmation, a blood sample was obtained. A second  
383 blood sample was obtained 6-9 months later from all 64 study participants. Participant  
384 characteristics and clinical signs are summarized in Table S1. Plasma was collected and stored  
385 at -80°C, The PBMCs were isolated via Ficoll-Paque separation, cryopreserved in 10%  
386 DMSO/FBS and stored in liquid nitrogen until analysis. The National Institute for Biological  
387 Standards and Control (NIBSC) 20/130 (research reagent) and 20/118 (reference panel) have  
388 been obtained from WHO Solidarity II, the global serologic study for COVID-19.

389

390 *SARS-CoV-2 detection*

391 Molecular detection of SARS-CoV-2 in combined nasopharyngeal/oropharyngeal swabs was  
392 performed as previously described (36). Briefly, RNA was extracted with the QIAamp Viral  
393 RNA Mini Kit (Qiagen) and real-time RT-PCR assays for SARS-CoV-2 RNA detection were  
394 performed in using primers/probes from Charité Virologie (Berlin, Germany (79)) to detect  
395 both E and RdRp genes.

396 *Virus neutralization assay*

397 The detection of neutralizing antibodies was achieved by foci reduction neutralization test  
398 (FRNT) similar as described before (80) and adapted to SARS-CoV-2. Briefly, serial diluted,  
399 heat-treated plasma samples were incubated with a Cambodian SARS-CoV-2 isolate (ancestral  
400 strain; GISAID: EPI\_ISL\_956384; (36)) for 30min at 37°C and 5% CO<sub>2</sub>. The mixtures were  
401 distributed on African green monkey kidney cells (VeroE6; ATCC CRL-1586) and incubated  
402 again for 30min 37°C and 5% CO<sub>2</sub>. Afterwards, the mixtures were replaced by an overlay  
403 medium containing 2% carboxymethyl cellulose (Sigma-Aldrich) in Dulbecco's modified  
404 Eagle medium (DMEM; Sigma-Aldrich) supplemented with 3% FBS (Gibco) and 100 U/mL  
405 penicillin-streptomycin (Gibco). Infection was visualized 16-18h after inoculation by staining  
406 of infected cells with a SARS-CoV-2-specific antibody (rabbit, antibodies-online GmbH),  
407 targeting the S2 subunit of the viral spike protein, and afterwards with antibody anti-rabbit IgG  
408 HRP conjugate (goat; antibodies-online GmbH). Finally, cells were incubated with TrueBlue  
409 TMB substrate (KPL), and infection events appear as stained foci and were counted with an  
410 ELISPOT reader (AID Autoimmune Diagnostika GmbH, Strassberg, Germany). The amount  
411 of neutralizing antibodies is expressed as the reciprocal serum dilution that induces 50%  
412 reduction of infection (FRNT50) compared to the positive control (virus only) and is calculated

413 by log probit regression analysis (SPSS for Windows, Version 16.0, SPSS Inc., Chicago, IL,  
414 USA). FRNT50 titers below 10 are considered negative.

#### 415 *S-expressing cell lines*

416 Transfected cell lines, Raji (ATCC® CCL-86™) and 293T (ATCC® CRL-3216™), with  
417 SARS-Cov-2 spike plasmid or a control plasmid using Lipofectamine 2000 (Life technologies)  
418 are kind gifts from Olivier Schwartz, Institut Pasteur, Paris, France (19). Spike-expressing Raji  
419 cells and Raji control cells were cultured at 37°C, 5% CO<sub>2</sub> in RPMI medium while 293T-spike  
420 cells and 293T control cells were cultured in DMEM medium. All media were completed with  
421 10% FBS (Gibco, MT, USA), 1% L glutamine (Gibco), 1% penicillin/streptomycin and  
422 puromycin (1 µg/mL, Gibo™) for cell selection during the culture.

#### 423 *S-Flow assay*

424 The S-Flow assay was performed as previously described (37). Briefly, plasma samples were  
425 diluted (1:200) in 1xPBS with 2mM EDTA and 0.5% BSA (PBS/BSA/EDTA) and incubated  
426 with 293T-spike cells (80000 cells/100µl) for 30 minutes on ice. The cells were washed with  
427 PBS/BSA/EDTA and stained either with anti-IgM PE (dilution 1:100, Biolegend) and anti-IgG  
428 Alexa Fluor™ 647 (dilution 1:600, Thermo Fisher) or anti-IgA Alexa Fluor 647 (dilution 1:800,  
429 Jakson ImmunoResearch) for 30 minutes on ice. The cells were washed with 1xPBS and fixed  
430 using buffer of the True-Nuclear Transcription Factor Staining kit (Biolegend). After fixing,  
431 the cells were washed and resuspended in 1xPBS. The results were acquired using FACS Canto  
432 II, BD Biosciences. The gating strategy for anti-IgM, anti-IgG or anti-IgA positive cells was  
433 based on the 293T control cells incubated with negative SARS-CoV-2 reference plasma. The  
434 data were reported as percentage of positive cells for anti-IgM, anti-IgG or anti-IgA. The  
435 NIBSC Research Reagent (20/130) and panel (20/118) (WHO Solidarity II) was utilized to set

436 the cutoff for positivity based on the background staining of the negative SARS-CoV-2 plasma  
437 and calculated following formula: cut-off= % positive cells + 2x standard deviation.

438 *Antibody dependent cellular phagocytosis (ADCP) assay*

439 THP-1 cells (ATCC® TIB-202™) were used as phagocytic cells. For this, 1 µg of biotinylated  
440 S1 protein (Genscripts) was used to saturate the binding sites on 1 µl of FluoroSphere  
441 neutravidin beads (Thermo Fisher) overnight at 4°C. Excess protein was removed by washing  
442 the pelleted beads. The protein-coated beads were incubated with 40 µl heated-inactivated  
443 plasma diluted in complete RPMI (1:40) for 15 minutes at room temperature. Then, 5x10<sup>4</sup> THP-  
444 1 cells suspended in 50 µl complete RPMI were added to the complex and incubated for 16  
445 hours at 37°C, 5% CO<sub>2</sub>. After incubation, the cells were washed with 1xPBS and fixed using  
446 buffer in True-Nuclear Transcription Factor Staining kit (Biolegend). After fixing, the cells  
447 were washed and resuspended in 1xPBS. The samples were analyzed using FACS Canto II, BD  
448 Biosciences. Phagocytosis activity was scored by the integrate mean fluorescence intensity  
449 (iMFI) value (% positive fluorescence THP-1 cells x MFI of the positive fluorescence THP-1  
450 cells).

451 *Complement dependent cytotoxicity (CDC) assay*

452 The assay used spike-expressing Raji cells as target cells, pooled serum (4 healthy donors) as  
453 complement source and heated-inactivated patient plasma as antibody source. In short, 50 µl of  
454 heated-inactivated plasma (1:50) were incubated with Raji-spike cells for 30 minutes at 37°C,  
455 5% CO<sub>2</sub>. Afterward, 50 µl of complete RPMI containing 15% of pooled serum was added into  
456 the cells and incubated at 37°C, 5% CO<sub>2</sub> for 14 hours. The cells were washed with PBS and  
457 stained with Zombie Aqua viability dye (BioLegend) for 20 minutes on ice and then stained  
458 anti-APC C3/C3b/iC3b antibody (Cedarlane) for 30 minutes on ice. The cells were fixed with

459 fixation buffer in True-Nuclear Transcription Factor Staining kit (Biolegend) for 20 minutes on  
460 ice. After fixing, the cells were washed and resuspended in 1xPBS. The samples were acquired  
461 using FACS Canto II, BD Biosciences. The results were reported as percentage of cell death  
462 and MFI of C3 deposition on the cells.

#### 463 *Antibody-dependent cellular cytotoxicity (ADCC) assay*

464 The assay used 293T-spike cells as a target cell and purified NK cells from healthy donor  
465 PMBCs as effector cells. First, 293T-spike cells were incubated with heated-inactivated patient  
466 plasma diluted in complete DMEM medium (1:50) at 37°C, 5% CO<sub>2</sub> for 30 minutes. The NK  
467 cells were enriched by magnetic negative selection (Miltenyi) according to manufacturer's  
468 instruction. The 293T-spike cells were washed five times with complete RPMI medium. The  
469 NK cells were mixed with 293T-spike cells at a ratio 1:1 at final volume of 100 µl complete  
470 RPMI. Anti-CD107a and Monensin (Biolegend) 1:1000 dilution were added to the suspension  
471 and incubated at 37°C, 5% CO<sub>2</sub> for 6 hours. The cells were washed with 1xPBS and stained  
472 with Zombie Aqua viability dye (BioLegend) for 20 minutes on ice. Then the cells were stained  
473 with anti-CD3 and anti-CD56 for 30 minutes on ice. The cells were washed and  
474 fixed/permeabilized using True-Nuclear Transcription Factor Staining kit (Biolegend) for 20  
475 minutes on ice. After staining, the cells were washed and resuspended in 1xPBS. The samples  
476 were acquired using FACS Canto II, BD Biosciences.

#### 477 *Detection of antigen-specific memory B cells*

478 Biotinylated SARS-CoV-2 S1 protein and biotinylated SARS-CoV-2 N protein were purchased  
479 from GenScript. The biotinylated proteins were combined with different streptavidin (SA)  
480 fluorophore conjugates, BUV496 (BD Biosciences) and PE (Biolegend), respectively, at 1:1  
481 molar ratio. Briefly, each SA was added gradually (3 times, every 20 minutes) to 20 µl of each

482 biotinylated protein (1  $\mu$ M) on ice. The reaction was quenched with D-biotin (GeneCopeia) at  
483 50:1 molar ratio to SA for a total probe volume of 30  $\mu$ l for 30 minutes on ice. Probes were  
484 then used immediately for staining. Each staining used 5  $\mu$ l of probe. Shortly, patient PBMCs  
485 was washed with 1xPBS and stained with Zombie Aqua viability dye (BioLegend) for 10  
486 minutes on ice. The cells were stained with the probes. Then the cells were washed and stained  
487 with anti-IgG antibody, for 30 minutes on ice. After that, the cells were washed and stained  
488 with master mix containing of anti-CD3, anti-CD19, anti-CD27, anti-CD38, anti-IgD, anti-IgM  
489 and anti-IgA antibodies for 30 minutes on ice Antibodies are listed in Table S2. After staining,  
490 the cells were washed and resuspended in 1xPBS with 2% FBS. The samples were analyzed  
491 using FACS Aria, BD Biosciences. The flow cytometry gating strategy to classify memory B  
492 cell subsets and switched B cells is shown in Figure S7. Overall, 40 samples were of sufficient  
493 quality and were included in the analysis.

#### 494 *Activation-induced markers (AIM) T cell assay*

495 Antigen-specific CD4<sup>+</sup> and CD8<sup>+</sup> T cells, as well as memory T cells and T helper subsets were  
496 assessed by Activation-Induced Marker (AIM) assay (6, 24). Cells were cultured at 37°C, 5%  
497 CO<sub>2</sub>, in the presence of SARS-CoV-2-specific S1, M and N protein pools [1  $\mu$ g/mL]  
498 (PepTivator® SARS-CoV-2 reagents; Miltenyi Biotec) in 96-well U-bottom plates at 0,5-1x10<sup>6</sup>  
499 PBMCs per well. After 24 hours, cells were washed in 1xPBS supplemented with 0.5% bovine  
500 serum albumin (BSA) and 2 mM EDTA (FACS buffer) and stained with Zombie Aqua Fixable  
501 Viability kit (Biolegend) and incubated for 20 min at 4°C followed by surface staining for 30  
502 min at 4°C. Stained cells were washed and resuspended in FACS buffer and analyzed using a  
503 FACS Aria Fusion (BD Biosciences). Antibodies are listed in Table S2. Negative controls  
504 without peptide stimulation were included for each donor. Antigen-specific CD4<sup>+</sup> and CD8<sup>+</sup> T

505 cells were measured subtracting the background (unstimulated control) from the peptide-  
506 stimulated sample. Negative results were set to zero. Data were analyzed with FlowJo software  
507 version 10.7.1 (FlowJo LLC). Overall, 33 samples were of sufficient quality and were included  
508 in the analysis.

#### 509 *Intracellular staining (ICS) assay*

510 Functional SARS-CoV-2-specific CD4<sup>+</sup> and CD8<sup>+</sup> T cells were assessed by surface and  
511 intracellular staining in a subset of individuals if sufficient amount of PBMCs were obtained  
512 (n=8). Cells were cultured at 37°C, 5% CO<sub>2</sub>, in the presence of SARS-CoV-2-specific S1, M  
513 and N protein pools separately [1 µg/mL each] (PepTivator® SARS-CoV-2 reagents; Miltenyi  
514 Biotec), Monensin (Biolegend) 1:1000 dilution and anti-Human CD28/CD49d purified [100  
515 µg/mL] (BD Bioscience) in 96-well U-bottom plates at 0.5-1x10<sup>6</sup> PBMCs per well. After 6  
516 hours, cells were washed in FACS buffer and stained using a Zombie Aqua Fixable Viability  
517 kit (Biolegend) and incubated for 20 minutes at 4°C. Cells were then washed in PBS and  
518 fixed/permeabilized with True-Nuclear™ Transcription Factor Buffer Set (Biolegend). Surface  
519 (CD3, CD4 and CD8) and intracellular markers (IFN-γ, IL-2, IL-4, IL-6 and IL-17) were  
520 detected via the subsequent addition of directly conjugated antibodies incubating for 30 minutes  
521 at 4°C. Antibodies are listed in Table S2. Stained cells were finally washed and resuspended in  
522 FACS buffer and analyzed using a FACSAria Fusion (BD Biosciences). Antigen-specific CD4<sup>+</sup>  
523 and CD8<sup>+</sup> T cells were measured subtracting the background (unstimulated control) from the  
524 peptide-stimulated sample. Negative results were set to zero. Data were analyzed with FlowJo  
525 software version 10.7.1 (FlowJo LLC).

#### 526 *Statistical analysis*

527 Calculations, figures and statistics were made using Prism 9 (GraphPad Software) or RStudio  
528 (Version 1.2.1335). The data were tested for statistical normality before applying the  
529 appropriate statistical tests. All information about sample sizes and statistical tests performed  
530 were shown in the figure legends. Spearman correlation plot was calculated and visualized with  
531 the following packages: FactoMineR, factoextra ([https://cran.r-project.org/web/](https://cran.r-project.org/web/packages/factoextra/index.html)  
532 [packages/factoextra/index.html](https://cran.r-project.org/web/packages/factoextra/index.html)) and corrplot (<https://github.com/taiyun/corrplot>) in R (Version  
533 3.6.1) and RStudio (Version 1.2.1335).

#### 534 *Data availability*

535 All data associated with this study are available in the main text or the supplementary materials.

536

#### 537 **References**

- 538 1. Zhu N, Zhang D, Wang W, Li X, Yang B, Song J, et al. A Novel Coronavirus from  
539 Patients with Pneumonia in China, 2019. *N Engl J Med.* 2020;382(8):727-33.
- 540 2. Chen N, Zhou M, Dong X, Qu J, Gong F, Han Y, et al. Epidemiological and clinical  
541 characteristics of 99 cases of 2019 novel coronavirus pneumonia in Wuhan, China: a  
542 descriptive study. *Lancet.* 2020;395(10223):507-13.
- 543 3. Guan WJ, Ni ZY, Hu Y, Liang WH, Ou CQ, He JX, et al. Clinical Characteristics of  
544 Coronavirus Disease 2019 in China. *N Engl J Med.* 2020.
- 545 4. Sette A, Crotty S. Adaptive immunity to SARS-CoV-2 and COVID-19. *Cell.*  
546 2021;184(4):861-80.
- 547 5. Wang M-Y, Zhao R, Gao L-J, Gao X-F, Wang D-P, Cao J-M. SARS-CoV-2:  
548 Structure, Biology, and Structure-Based Therapeutics Development. *Frontiers in Cellular and*  
549 *Infection Microbiology.* 2020;10:724.
- 550 6. Grifoni A, Weiskopf D, Ramirez SI, Mateus J, Dan JM, Moderbacher CR, et al.  
551 Targets of T Cell Responses to SARS-CoV-2 Coronavirus in Humans with COVID-19  
552 Disease and Unexposed Individuals. *Cell.* 2020;181(7):1489-501.e15.
- 553 7. Yoshida S, Ono C, Hayashi H, Fukumoto S, Shiraishi S, Tomono K, et al. SARS-  
554 CoV-2-induced humoral immunity through B cell epitope analysis in COVID-19 infected  
555 individuals. *Scientific Reports.* 2021;11(1):5934.
- 556 8. Wang Q, Zhang Y, Wu L, Niu S, Song C, Zhang Z, et al. Structural and Functional  
557 Basis of SARS-CoV-2 Entry by Using Human ACE2. *Cell.* 2020;181(4):894-904.e9.
- 558 9. Yan R, Zhang Y, Li Y, Xia L, Guo Y, Zhou Q. Structural basis for the recognition of  
559 SARS-CoV-2 by full-length human ACE2. *Science.* 2020;367(6485):1444-8.



- 560 10. Dispinseri S, Secchi M, Pirillo MF, Tolazzi M, Borghi M, Brigatti C, et al.  
561 Neutralizing antibody responses to SARS-CoV-2 in symptomatic COVID-19 is persistent and  
562 critical for survival. *Nature Communications*. 2021;12(1):2670.
- 563 11. Wajnberg A, Amanat F, Firpo A, Altman DR, Bailey MJ, Mansour M, et al. Robust  
564 neutralizing antibodies to SARS-CoV-2 infection persist for months. *Science*.  
565 2020;370(6521):1227.
- 566 12. Legros V, Denolly S, Vogrig M, Boson B, Siret E, Rigail J, et al. A longitudinal study  
567 of SARS-CoV-2-infected patients reveals a high correlation between neutralizing antibodies  
568 and COVID-19 severity. *Cellular & Molecular Immunology*. 2021;18(2):318-27.
- 569 13. Yu J, Tostanoski LH, Peter L, Mercado NB, McMahan K, Mahrokhian SH, et al. DNA  
570 vaccine protection against SARS-CoV-2 in rhesus macaques. *Science*. 2020;369(6505):806-  
571 11.
- 572 14. Schäfer A, Muecksch F, Lorenzi JCC, Leist SR, Cipolla M, Bournazos S, et al.  
573 Antibody potency, effector function, and combinations in protection and therapy for SARS-  
574 CoV-2 infection in vivo. *J Exp Med*. 2021;218(3).
- 575 15. Capetti AF, Borgonovo F, Mileto D, Gagliardi G, Mariani C, Lupo A, et al. One-year  
576 durability of anti-spike IgG to SARS-CoV-2: preliminary data from the AntiCROWN  
577 prospective observational study One year durability of COVID-19 anti-spike IgG. *J Infect*.  
578 2021.
- 579 16. Kang CK, Kim M, Lee S, Kim G, Choe PG, Park WB, et al. Longitudinal Analysis of  
580 Human Memory T-Cell Response according to the Severity of Illness up to 8 Months after  
581 SARS-CoV-2 Infection. *J Infect Dis*. 2021.
- 582 17. Wang Z, Muecksch F, Schaefer-Babajew D, Finkin S, Viant C, Gaebler C, et al.  
583 Naturally enhanced neutralizing breadth against SARS-CoV-2 one year after infection.  
584 *Nature*. 2021.
- 585 18. Bournazos S, Ravetch JV. Fcγ Receptor Function and the Design of Vaccination  
586 Strategies. *Immunity*. 2017;47(2):224-33.
- 587 19. Dufloo J, Grzelak L, Staropoli I, Madec Y, Tondeur L, Anna F, et al. Asymptomatic  
588 and symptomatic SARS-CoV-2 infections elicit polyfunctional antibodies. *Cell Rep Med*.  
589 2021;2(5):100275.
- 590 20. Natarajan H, Crowley AR, Butler SE, Xu S, Weiner JA, Bloch EM, et al. Markers of  
591 Polyfunctional SARS-CoV-2 Antibodies in Convalescent Plasma. *mBio*. 2021;12(2).
- 592 21. Zohar T, Loos C, Fischinger S, Atyeo C, Wang C, Slein MD, et al. Compromised  
593 Humoral Functional Evolution Tracks with SARS-CoV-2 Mortality. *Cell*. 2020;183(6):1508-  
594 19.e12.
- 595 22. Anand SP, Prévost J, Nayrac M, Beaudoin-Bussièrès G, Benlarbi M, Gasser R, et al.  
596 Longitudinal analysis of humoral immunity against SARS-CoV-2 Spike in convalescent  
597 individuals up to eight months post-symptom onset. *Cell Rep Med*. 2021:100290.
- 598 23. Lee WS, Selva KJ, Davis SK, Wines BD, Reynaldi A, Esterbauer R, et al. Decay of  
599 Fc-dependent antibody functions after mild to moderate COVID-19. *Cell Rep Med*.  
600 2021:100296.
- 601 24. Dan JM, Mateus J, Kato Y, Hastie KM, Yu ED, Faliti CE, et al. Immunological  
602 memory to SARS-CoV-2 assessed for up to 8 months after infection. *Science*.  
603 2021;371(6529).

- 604 25. Bonifacius A, Tischer-Zimmermann S, Dragon AC, Gussarow D, Vogel A, Krettek U,  
605 et al. COVID-19 immune signatures reveal stable antiviral T cell function despite declining  
606 humoral responses. *Immunity*. 2021;54(2):340-54.e6.
- 607 26. Gaebler C, Wang Z, Lorenzi JCC, Muecksch F, Finkin S, Tokuyama M, et al.  
608 Evolution of antibody immunity to SARS-CoV-2. *Nature*. 2021;591(7851):639-44.
- 609 27. Zuo J, Dowell AC, Pearce H, Verma K, Long HM, Begum J, et al. Robust SARS-  
610 CoV-2-specific T cell immunity is maintained at 6 months following primary infection. *Nat*  
611 *Immunol*. 2021;22(5):620-6.
- 612 28. Wheatley AK, Juno JA, Wang JJ, Selva KJ, Reynaldi A, Tan HX, et al. Evolution of  
613 immune responses to SARS-CoV-2 in mild-moderate COVID-19. *Nat Commun*.  
614 2021;12(1):1162.
- 615 29. Peluso MJ, Deitchman AN, Torres L, Iyer NS, Munter SE, Nixon CC, et al. Long-  
616 term SARS-CoV-2-specific immune and inflammatory responses in individuals recovering  
617 from COVID-19 with and without post-acute symptoms. *Cell Reports*. 2021;36(6):109518.
- 618 30. Le Bert N, Tan AT, Kunasegaran K, Tham CYL, Hafezi M, Chia A, et al. SARS-  
619 CoV-2-specific T cell immunity in cases of COVID-19 and SARS, and uninfected controls.  
620 *Nature*. 2020;584(7821):457-62.
- 621 31. Sariol A, Perlman S. Lessons for COVID-19 Immunity from Other Coronavirus  
622 Infections. *Immunity*. 2020;53(2):248-63.
- 623 32. Noh JY, Kwak J-E, Yang J-S, Hwang SY, Yoon JG, Seong H, et al. Longitudinal  
624 assessment of anti-SARS-CoV-2 immune responses for six months based on the clinical  
625 severity of COVID-19. *The Journal of Infectious Diseases*. 2021.
- 626 33. Ravichandran S, Lee Y, Grubbs G, Coyle EM, Klenow L, Akasaka O, et al.  
627 Longitudinal antibody repertoire in "mild" versus "severe" COVID-19 patients reveals  
628 immune markers associated with disease severity and resolution. *Sci Adv*. 2021;7(10).
- 629 34. Long Q-X, Jia Y-J, Wang X, Deng H-J, Cao X-X, Yuan J, et al. Immune memory in  
630 convalescent patients with asymptomatic or mild COVID-19. *Cell Discovery*. 2021;7(1):18.
- 631 35. WHO. COVID-19 Situation reports. 2021 [Available from:  
632 <https://www.who.int/cambodia/emergencies/covid-19-response-in-cambodia/situation-reports>.  
633
- 634 36. Auerswald H, Yann S, Dul S, In S, Dussart P, Martin NJ, et al. Assessment of  
635 inactivation procedures for SARS-CoV-2. *J Gen Virol*. 2021;102(3).
- 636 37. Grzelak L, Temmam S, Planchais C, Demeret C, Tondeur L, Huon C, et al. A  
637 comparison of four serological assays for detecting anti-SARS-CoV-2 antibodies in human  
638 serum samples from different populations. *Sci Transl Med*. 2020;12(559).
- 639 38. Mesin L, Schiepers A, Ersching J, Barbulescu A, Cavazzoni CB, Angelini A, et al.  
640 Restricted Clonality and Limited Germinal Center Reentry Characterize Memory B Cell  
641 Reactivation by Boosting. *Cell*. 2020;180(1):92-106.e11.
- 642 39. Rodda LB, Netland J, Shehata L, Pruner KB, Morawski PA, Thouvenel CD, et al.  
643 Functional SARS-CoV-2-Specific Immune Memory Persists after Mild COVID-19. *Cell*.  
644 2021;184(1):169-83.e17.
- 645 40. Peng Y, Mentzer AJ, Liu G, Yao X, Yin Z, Dong D, et al. Broad and strong memory  
646 CD4+ and CD8+ T cells induced by SARS-CoV-2 in UK convalescent individuals following  
647 COVID-19. *Nature Immunology*. 2020;21(11):1336-45.
- 648 41. Chia WN, Zhu F, Ong SWX, Young BE, Fong SW, Le Bert N, et al. Dynamics of  
649 SARS-CoV-2 neutralising antibody responses and duration of immunity: a longitudinal study.  
*Lancet Microbe*. 2021;2(6):e240-e9.

- 650 42. Yang F, Nielsen SCA, Hoh RA, Röltgen K, Wirz OF, Haraguchi E, et al. Shared B  
651 cell memory to coronaviruses and other pathogens varies in human age groups and tissues.  
652 *Science*. 2021;372(6543):738-41.
- 653 43. Ogbe A, Kronsteiner B, Skelly DT, Pace M, Brown A, Adland E, et al. T cell assays  
654 differentiate clinical and subclinical SARS-CoV-2 infections from cross-reactive antiviral  
655 responses. *Nat Commun*. 2021;12(1):2055.
- 656 44. Low JS, Vaqueirinho D, Mele F, Foglierini M, Jerak J, Perotti M, et al. Clonal  
657 analysis of immunodominance and cross-reactivity of the CD4 T cell response to SARS-CoV-  
658 2. *Science*. 2021.
- 659 45. da Silva Antunes R, Pallikkuth S, Williams E, Esther DY, Mateus J, Quiambao L, et  
660 al. Differential T cell reactivity to endemic coronaviruses and SARS-CoV-2 in community  
661 and health care workers. *J Infect Dis*. 2021.
- 662 46. Zeberg H, Pääbo S. The major genetic risk factor for severe COVID-19 is inherited  
663 from Neanderthals. *Nature*. 2020;587(7835):610-2.
- 664 47. Zhou P, Yang X-L, Wang X-G, Hu B, Zhang L, Zhang W, et al. A pneumonia  
665 outbreak associated with a new coronavirus of probable bat origin. *Nature*.  
666 2020;579(7798):270-3.
- 667 48. Wacharapluesadee S, Tan CW, Maneorn P, Duengkae P, Zhu F, Joyjinda Y, et al.  
668 Evidence for SARS-CoV-2 related coronaviruses circulating in bats and pangolins in  
669 Southeast Asia.
- 670 49. Hul V, Delaune D, Karlsson EA, Hassanin A, Tey PO, Baidaliuk A, et al. A novel  
671 SARS-CoV-2 related coronavirus in bats from Cambodia. *bioRxiv*. 2021:2021.01.26.428212.
- 672 50. Van Elslande J, Gruwier L, Godderis L, Vermeersch P. Estimated half-life of SARS-  
673 CoV-2 anti-spike antibodies more than double the half-life of anti-nucleocapsid antibodies in  
674 healthcare workers. *Clin Infect Dis*. 2021.
- 675 51. Harrington WE, Trakhimets O, Andrade DV, Dambrauskas N, Raappana A, Jiang Y,  
676 et al. Rapid decline of neutralizing antibodies is associated with decay of IgM in adults  
677 recovered from mild COVID-19. *Cell Rep Med*. 2021;2(4):100253.
- 678 52. Souilmi Y, Lauterbur ME, Tobler R, Huber CD, Johar AS, Moradi SV, et al. An  
679 ancient viral epidemic involving host coronavirus interacting genes more than 20,000 years  
680 ago in East Asia. *Curr Biol*. 2021.
- 681 53. Sherina N, Piralla A, Du L, Wan H, Kumagai-Braesch M, Andréll J, et al. Persistence  
682 of SARS-CoV-2-specific B and T cell responses in convalescent COVID-19 patients 6-  
683 8 months after the infection. *Med (N Y)*. 2021;2(3):281-95.e4.
- 684 54. Guo L, Ren L, Yang S, Xiao M, Chang D, Yang F, et al. Profiling Early Humoral  
685 Response to Diagnose Novel Coronavirus Disease (COVID-19). *Clin Infect Dis*.  
686 2020;71(15):778-85.
- 687 55. Cervia C, Nilsson J, Zurbuchen Y, Valaperti A, Schreiner J, Wolfensberger A, et al.  
688 Systemic and mucosal antibody responses specific to SARS-CoV-2 during mild versus severe  
689 COVID-19. *J Allergy Clin Immunol*. 2021;147(2):545-57.e9.
- 690 56. Sterlin D, Mathian A, Miyara M, Mohr A, Anna F, Claër L, et al. IgA dominates the  
691 early neutralizing antibody response to SARS-CoV-2. *Sci Transl Med*. 2021;13(577).
- 692 57. Gasser R, Cloutier M, Prévost J, Fink C, Ducas É, Ding S, et al. Major role of IgM in  
693 the neutralizing activity of convalescent plasma against SARS-CoV-2. *Cell Reports*.  
694 2021;34(9):108790.

- 695 58. Tay MZ, Wiehe K, Pollara J. Antibody-Dependent Cellular Phagocytosis in Antiviral  
696 Immune Responses. *Frontiers in Immunology*. 2019;10(332).
- 697 59. Sakharkar M, Rappazzo CG, Wieland-Alter WF, Hsieh CL, Wrapp D, Esterman ES, et  
698 al. Prolonged evolution of the human B cell response to SARS-CoV-2 infection. *Sci*  
699 *Immunol*. 2021;6(56).
- 700 60. Dugan HL, Stamper CT, Li L, Changrob S, Asby NW, Halfmann PJ, et al. Profiling B  
701 cell immunodominance after SARS-CoV-2 infection reveals antibody evolution to non-  
702 neutralizing viral targets. *Immunity*. 2021;54(6):1290-303.e7.
- 703 61. Robbiani DF, Gaebler C, Muecksch F, Lorenzi JCC, Wang Z, Cho A, et al.  
704 Convergent antibody responses to SARS-CoV-2 in convalescent individuals. *Nature*.  
705 2020;584(7821):437-42.
- 706 62. Kreer C, Zehner M, Weber T, Ercanoglu MS, Gieselmann L, Rohde C, et al.  
707 Longitudinal Isolation of Potent Near-Germline SARS-CoV-2-Neutralizing Antibodies from  
708 COVID-19 Patients. *Cell*. 2020;182(4):843-54.e12.
- 709 63. Reiss S, Baxter AE, Cirelli KM, Dan JM, Morou A, Daigneault A, et al. Comparative  
710 analysis of activation induced marker (AIM) assays for sensitive identification of antigen-  
711 specific CD4 T cells. *PLoS One*. 2017;12(10):e0186998.
- 712 64. Sekine T, Perez-Potti A, Rivera-Ballesteros O, Strålin K, Gorin JB, Olsson A, et al.  
713 Robust T Cell Immunity in Convalescent Individuals with Asymptomatic or Mild COVID-19.  
714 *Cell*. 2020;183(1):158-68.e14.
- 715 65. Cohen KW, Linderman SL, Moodie Z, Czartoski J, Lai L, Mantus G, et al.  
716 Longitudinal analysis shows durable and broad immune memory after SARS-CoV-2 infection  
717 with persisting antibody responses and memory B and T cells. *Cell Reports Medicine*.  
718 2021;2(7).
- 719 66. Willinger T, Freeman T, Hasegawa H, McMichael AJ, Callan MF. Molecular  
720 signatures distinguish human central memory from effector memory CD8 T cell subsets. *J*  
721 *Immunol*. 2005;175(9):5895-903.
- 722 67. Hartley GE, Edwards ESJ, Aui PM, Varese N, Stojanovic S, McMahon J, et al. Rapid  
723 generation of durable B cell memory to SARS-CoV-2 spike and nucleocapsid proteins in  
724 COVID-19 and convalescence. *Sci Immunol*. 2020;5(54).
- 725 68. Cubuk J, Alston JJ, Incicco JJ, Singh S, Stuchell-Brereton MD, Ward MD, et al. The  
726 SARS-CoV-2 nucleocapsid protein is dynamic, disordered, and phase separates with RNA.  
727 *Nature Communications*. 2021;12(1):1936.
- 728 69. Laha S, Chakraborty J, Das S, Manna SK, Biswas S, Chatterjee R. Characterizations  
729 of SARS-CoV-2 mutational profile, spike protein stability and viral transmission. *Infection,*  
730 *Genetics and Evolution*. 2020;85:104445.
- 731 70. Korber B, Fischer WM, Gnanakaran S, Yoon H, Theiler J, Abfalterer W, et al.  
732 Tracking Changes in SARS-CoV-2 Spike: Evidence that D614G Increases Infectivity of the  
733 COVID-19 Virus. *Cell*. 2020;182(4):812-27.e19.
- 734 71. Ng KW, Faulkner N, Cornish GH, Rosa A, Harvey R, Hussain S, et al. Preexisting and  
735 de novo humoral immunity to SARS-CoV-2 in humans. *Science*. 2020;370(6522):1339.
- 736 72. Song G, He W-t, Callaghan S, Anzanello F, Huang D, Ricketts J, et al. Cross-reactive  
737 serum and memory B-cell responses to spike protein in SARS-CoV-2 and endemic  
738 coronavirus infection. *Nature Communications*. 2021;12(1):2938.

- 739 73. Bartsch YC, Fischinger S, Siddiqui SM, Chen Z, Yu J, Gebre M, et al. Discrete  
740 SARS-CoV-2 antibody titers track with functional humoral stability. *Nature Communications*.  
741 2021;12(1):1018.
- 742 74. Pušnik J, Richter E, Schulte B, Dolscheid-Pommerich R, Bode C, Putensen C, et al.  
743 Memory B cells targeting SARS-CoV-2 spike protein and their dependence on CD4(+) T cell  
744 help. *Cell Rep*. 2021:109320.
- 745 75. Chakraborty S, Gonzalez J, Edwards K, Mallajosyula V, Buzzanco AS, Sherwood R,  
746 et al. Proinflammatory IgG Fc structures in patients with severe COVID-19. *Nature*  
747 *Immunology*. 2021;22(1):67-73.
- 748 76. Larsen MD, de Graaf EL, Sonneveld ME, Plomp HR, Nouta J, Hoepel W, et al.  
749 Afucosylated IgG characterizes enveloped viral responses and correlates with COVID-19  
750 severity. *Science*. 2021;371(6532).
- 751 77. Shields RL, Lai J, Keck R, O'Connell LY, Hong K, Meng YG, et al. Lack of fucose on  
752 human IgG1 N-linked oligosaccharide improves binding to human Fcγ3 and  
753 antibody-dependent cellular toxicity. *J Biol Chem*. 2002;277(30):26733-40.
- 754 78. Pereira NA, Chan KF, Lin PC, Song Z. The "less-is-more" in therapeutic antibodies:  
755 Afucosylated anti-cancer antibodies with enhanced antibody-dependent cellular cytotoxicity.  
756 *MAbs*. 2018;10(5):693-711.
- 757 79. Corman VM, Landt O, Kaiser M, Molenkamp R, Meijer A, Chu DK, et al. Detection  
758 of 2019 novel coronavirus (2019-nCoV) by real-time RT-PCR. *Euro surveillance : bulletin*  
759 *European sur les maladies transmissibles = European communicable disease bulletin*.  
760 2020;25(3):2000045.
- 761 80. Auerswald H, Boussioux C, In S, Mao S, Ong S, Huy R, et al. Broad and long-lasting  
762 immune protection against various Chikungunya genotypes demonstrated by participants in a  
763 cross-sectional study in a Cambodian rural community. *Emerg Microbes Infect*. 2018;7(1):13.  
764

## 765 **Acknowledgements**

766 This publication has been supported by WHO Solidarity II, global serologic study for COVID-  
767 19, with funding from the German Federal Ministry of Health (BMG) COVID-19 Research and  
768 development to WHO. We would like to acknowledge all patients that participated to the study.  
769 We would like to thank Borita Heng for her technical assistance.

770 The study was funded by the Howard Hughes Medical Institute (HHMI)–Wellcome Trust  
771 (208710/Z/17/Z to T.C.), and « URGENCE COVID-19 » fundraising campaign of Institut  
772 Pasteur (T.C., H.A.,P.D.). H.A. is supported by the German Centre for International Migration  
773 and Development (CIM). The graphical abstract was created with BioRender.com

## 774 **Author contributions**

775 Conceptualization: TC, PD, EAK; Methodology: HV, AM, HA, LS, SS, NY, PP; Investigation:  
776 HV, AM, HA, BT, DV, TC, EAK; Visualisation: HV, AM, HA, SL; Funding acquisition: TC,  
777 HA, PD; Patient inclusion: HS, SS; Cohort management and patient selection: SL, SL; Project  
778 administration: TC, EAK, PP, PD; Supervision: HV, AM, BT, SO, DV, EAK, TC; Writing,  
779 original draft: HV, AM, HA, TB, EAK, TC; Writing, review and editing: HV, AM, HA, TB,  
780 VD, OS, EAK, TC

### 781 **Competing interests**

782 The authors declare no competing interests

### 783 **Supplemental information**

784 Fig. S1. Characterization of the cohort

785 Fig. S2. Measurement of anti-S-binding antibodies using S-Flow

786 Fig. S3. Analysis of antibody features in paired patient samples

787 Fig. S4. Antibody-dependent cellular phagocytosis (ADCP) assay

788 Fig. S5. Complement-dependent cytotoxicity (CDC) assay

789 Fig. S6. Antibody-dependent cellular cytotoxicity (ADCC) assay

790 Fig. S7. Representative gating strategy used to define antigen-specific B cells

791 Fig. S8. Representative gating strategy used for the T cells assays

792 Fig. S9. Characterization of SARS-CoV-2-specific T Cells

793 Fig. S10. Comparison of immune parameters in asymptomatic and symptomatic individuals

794 Table S1. Cohort Description

795 Table S2. Monoclonal antibody list

796

797 **Figures**

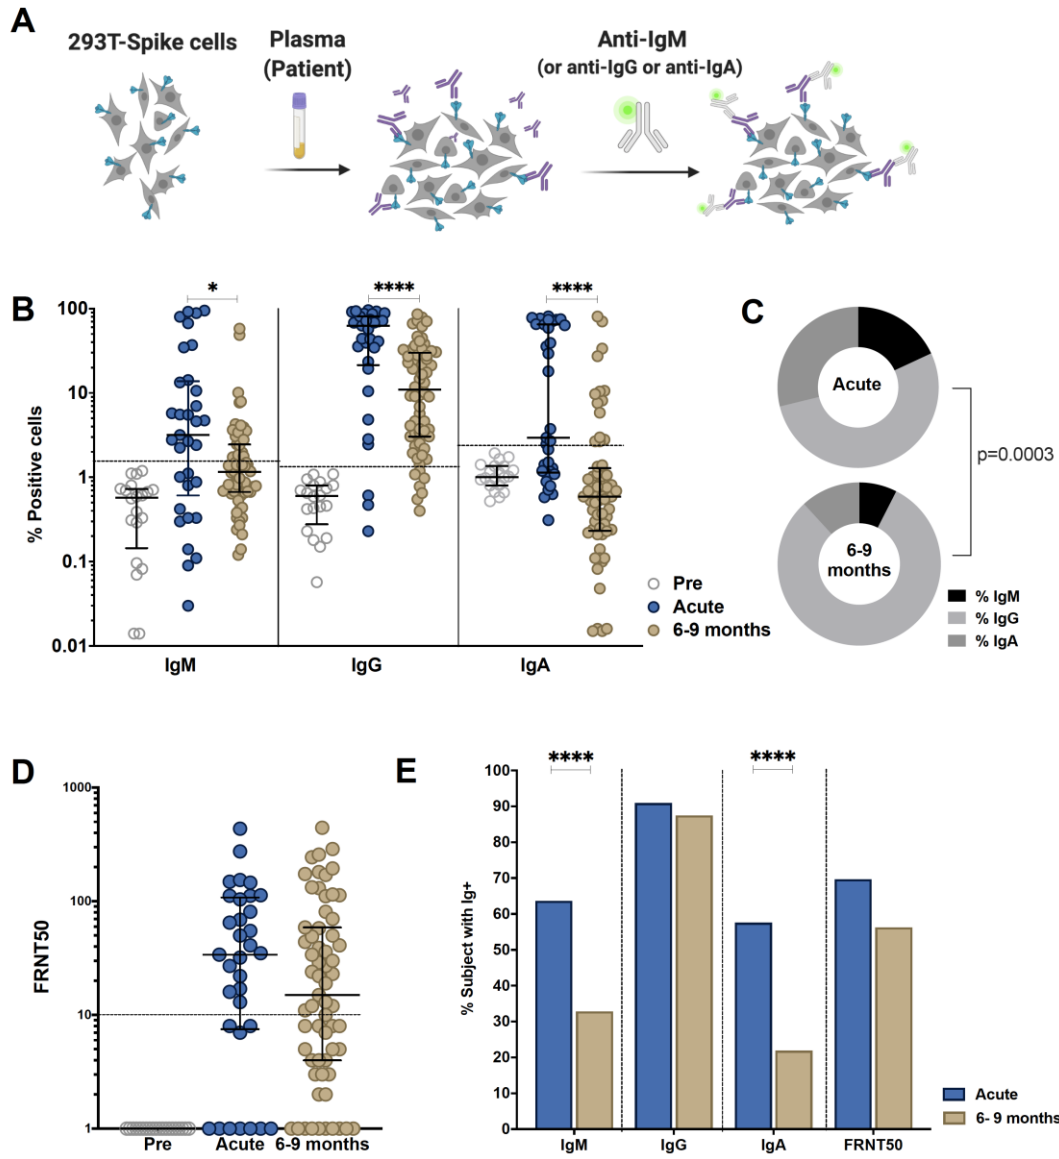

798

799 **Figure 1. Comparison of antibody response in SARS-CoV-2-infected individuals during**  
800 **the acute phase and 6-9 months post infection.** Individuals were sampled 2-9 days post  
801 laboratory confirmation and 6-9 months later. **(A)** Schematic model of the S-Flow assay. **(B)**  
802 Amount of antibodies against spike protein were reported as percentage of spike-expressing  
803 293T cells bound by IgM, IgG, IgA in the S-Flow assay. **(C)** Pie charts show the proportion of  
804 anti-S IgM, IgG and IgA antibodies. **(D)** SARS-CoV-2 neutralizing activity was calculated as  
805 FRNT50 titer in foci reduction neutralization test (FRNT). **(E)** Comparison of the percentage  
806 of individuals positive for anti-S IgM, IgG, IgA and FRNT50. Statistical comparisons were  
807 performed by Mann Whitney test (B and D) and Chi-square test (C and E). The dashed line  
808 indicates the cutoff for positivity based on values calculated following formula: cut-off = %  
809 mean positive cells from 19 pre-pandemic samples + 3x standard deviation. Each dot represents  
810 the result from a single individual. Lines represent median and IQR. \*p < 0.05, \*\*p < 0.01,  
811 \*\*\*p < 0.001, and \*\*\*\*p < 0.0001. Pre-pandemic n=19, acute n=33, 6-9 months n=64.



### Antibody-dependent cellular phagocytosis (ADCP)

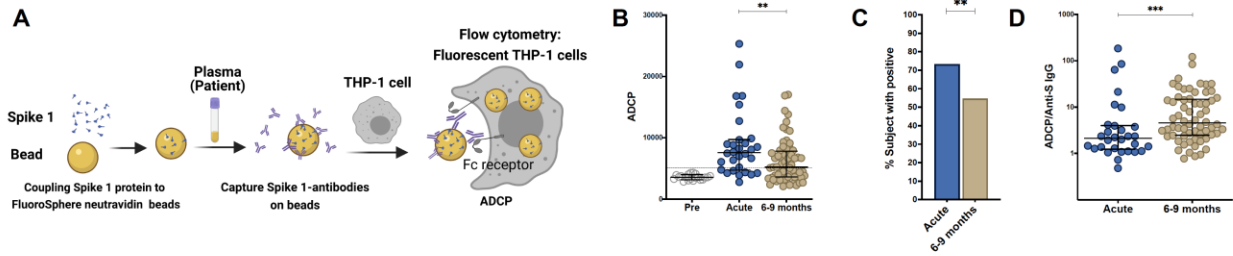

### Complement-dependent cytotoxicity (CDC)

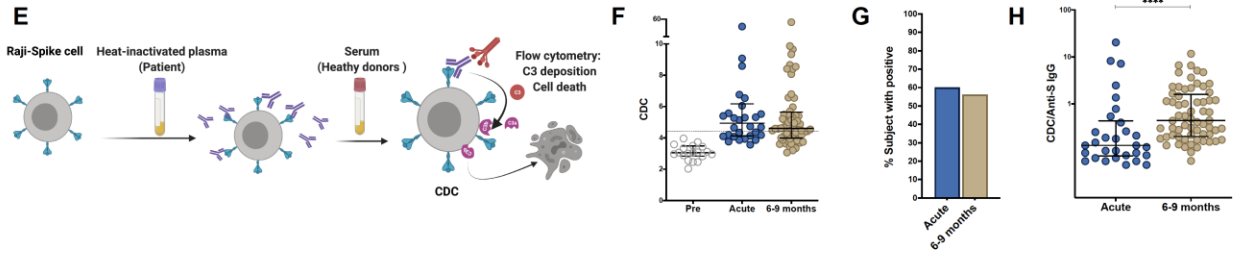

### Antibody-dependent cellular cytotoxicity (ADCC)

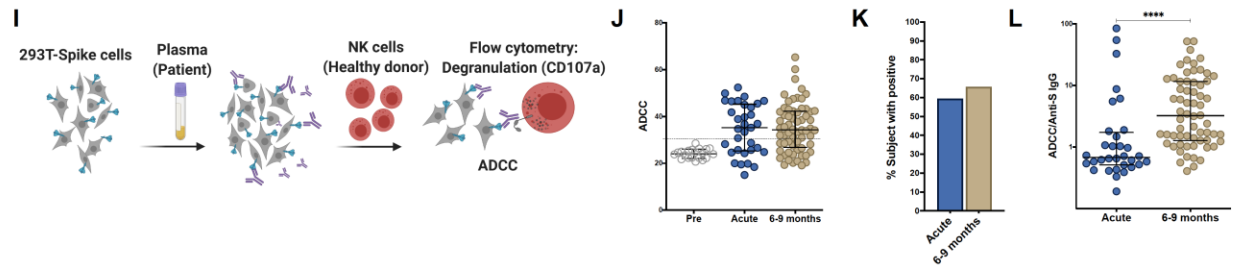

813 **Figure 2. Comparison of effector function profiles of plasma from SARS-CoV-2-infected**  
814 **individuals during the acute phase and 6-9 months post infection.** Individuals were sampled  
815 2-9 days post laboratory confirmation and 6-9 months later. **(A)** Schematic representation of  
816 the antibody-dependent cellular phagocytosis (ADCP) assay. **(B)** Comparison of ADCP activity  
817 in pre-pandemic samples, SARS-CoV-2-infected individuals in the acute phase of infection and  
818 6-9 months later. **(C)** Ratio of ADCP to anti-spike IgG measured by S-Flow. **(D)** Schematic  
819 representation of complement-dependent cytotoxicity (CDC) assay. **(E)** Comparison of CDC  
820 activity in pre-pandemic samples, SARS-CoV-2-infected individuals in the acute phase of  
821 infection and 6-9 months later. **(F)** Ratio of CDC to anti-spike IgG as measured by S-Flow. **(G)**  
822 Schematic representation of antibody-dependent cellular cytotoxicity (ADCC). SARS-CoV-2  
823 plasma induced NK degranulation as measured by CD107a staining using spike-expressing  
824 293T cells as target cells. NK cells were isolated from healthy donors. **(H)** Comparison of  
825 ADCC activity in pre-pandemic samples, SARS-CoV-2-infected individuals in the acute phase  
826 of infection and 6-9 months later. **(I)** Ratio of ADCC to anti-spike IgG as measured by S-Flow.  
827 Statistical comparisons were performed by Mann Whitney test. The dashed line indicates the  
828 cutoff for positivity set based on values calculated following formula: cut-off = % mean positive  
829 cells from 19 pre-pandemic samples + 3x standard deviation. Each dot represents result from a  
830 single individual. Lines represent median and IQR. \*\*p <0.01, \*\*\*p <0.001, and \*\*\*\*p <  
831 0.0001. Pre-pandemic n=19, acute n=33, 6-9 months n=64.

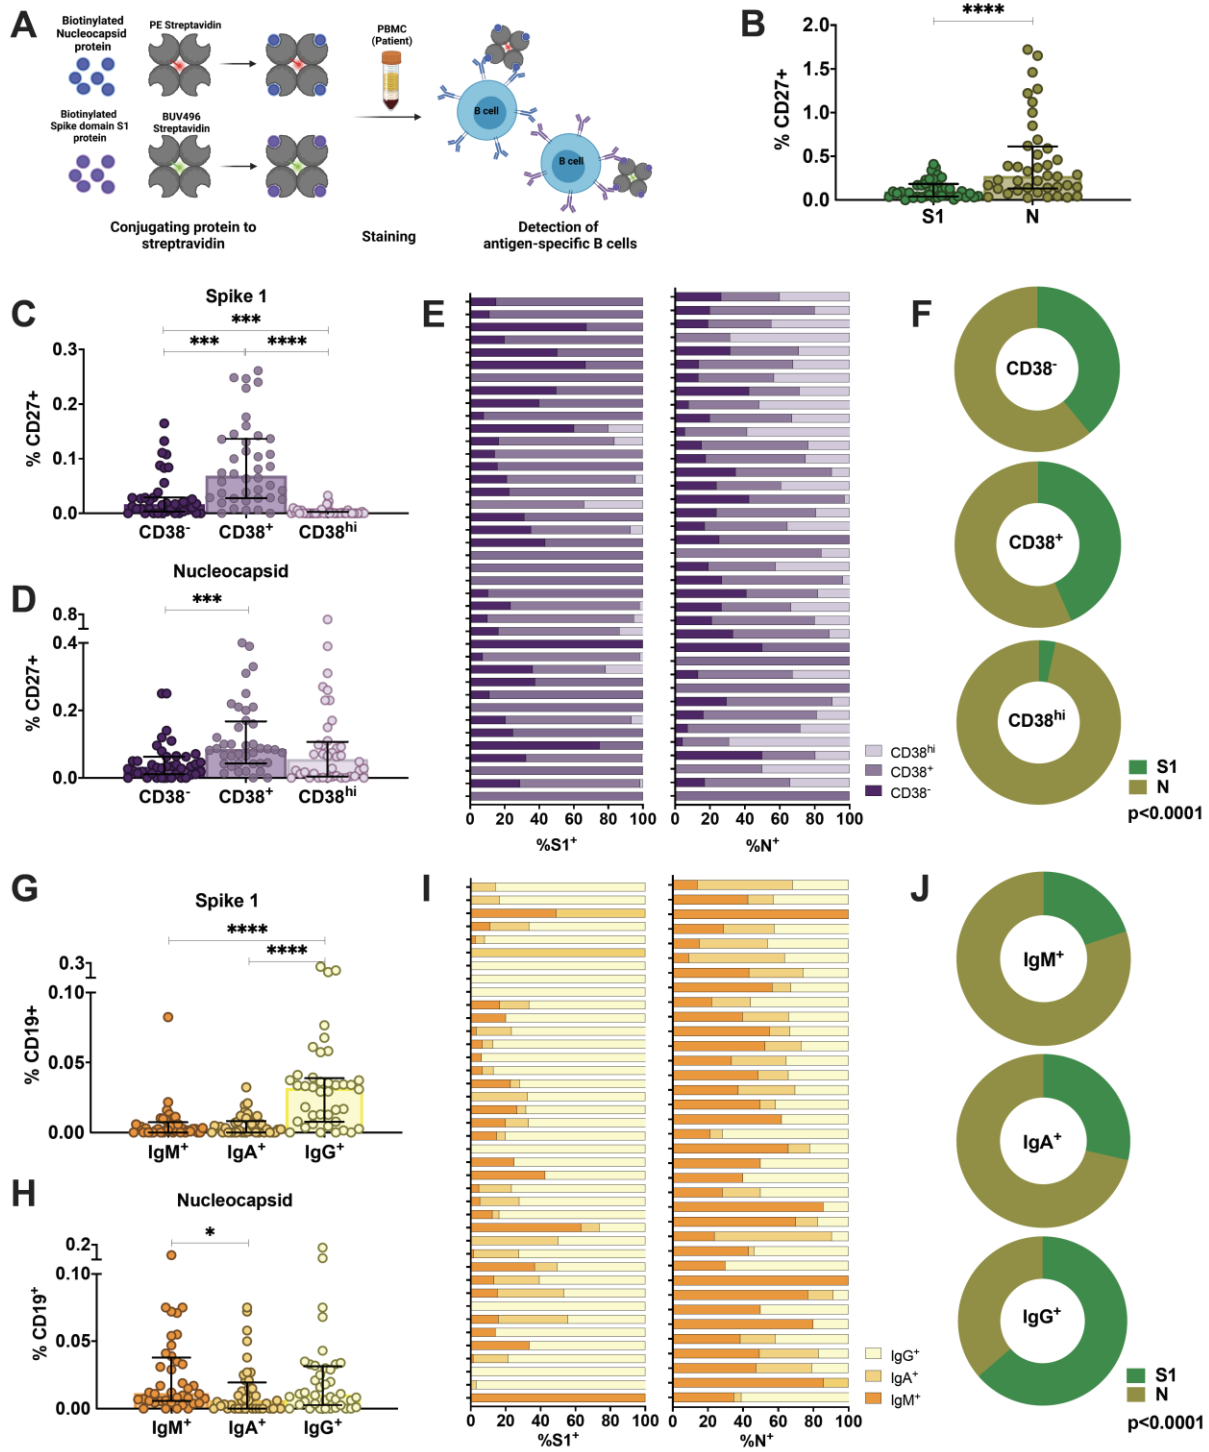

832

833 **Figure 3. Characterization of antigen-specific memory B cells in the peripheral blood of**  
834 **individuals infected with SARS-CoV-2 6-9 months after infection.**

835 (A) Schematic representation of the memory B cell assay. (B) Comparison of percentages of  
836 S1-specific or N-specific memory B cells (CD19<sup>+</sup>CD27<sup>+</sup>). (C, D) Percentages of S1- and N-  
837 specific B cells among resting memory B cells (CD38<sup>-</sup>), activated memory B cells (CD38<sup>+</sup>) or  
838 plasmablasts within the CD27<sup>+</sup> memory B cell population. (E, F) Proportion of S1-specific and  
839 N-specific CD27<sup>+</sup>CD19<sup>+</sup> B cell subsets for each individual and the whole cohort (G, H)  
840 Percentages of S1- and N-specific cells in non-class-switched B cells (IgD<sup>-</sup>IgM<sup>+</sup>) or class-  
841 switched B cells (IgD<sup>-</sup>IgA<sup>+</sup> or IgD<sup>-</sup>IgG<sup>+</sup>). (I, J) Proportion of S1-specific and N-specific  
842 switched and unswitched CD19<sup>+</sup> B cells for each individual and for the whole cohort. Statistical  
843 comparisons were performed by Mann-Whitney test (B), Wilcoxon Rank Sum test (C, D, G, H)  
844 or Chi-square test (F, J). The dashed line indicates the cutoff for positivity set based on values  
845 calculated following formula: cut-off = % mean positive cells from 19 pre-pandemic samples  
846 + 3x standard deviation. Each dot represents result from a single individual (n=40). Lines  
847 represent median and IQR. \*\*p < 0.01, \*\*\*p < 0.001, and \*\*\*\*p < 0.0001. n = 40. S1: subunit  
848 1 of spike protein, N: Nucleocapsid protein.

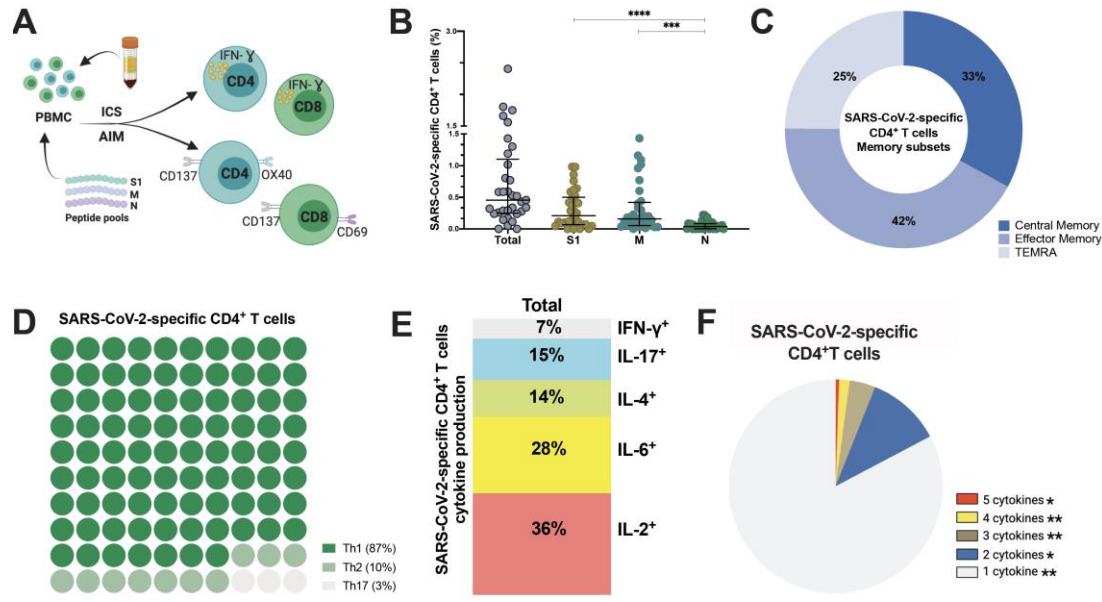

849

850 **Figure 4. SARS-CoV-2-specific CD4<sup>+</sup> T cells 6-9 months post-infection.** (A) Schematic  
 851 representation of the CD4<sup>+</sup> T cell assay (B) Frequency (percentage of CD4<sup>+</sup> T cells) of total  
 852 SARS-CoV-2-specific CD4<sup>+</sup> T cells after overnight stimulation with S, M and N peptide pools  
 853 as assessed by induced expression of OX40 and CD137. Each dot represents result from a single  
 854 individual (n=8). Lines represent median and IQR, n=33 (B) Distribution of SARS-CoV-2-  
 855 specific CD4<sup>+</sup> T cells among central memory, effector memory, and terminally differentiated  
 856 effector memory cells (TEMRA). (C) Frequencies of SARS-CoV-2-specific CD4<sup>+</sup> T helper  
 857 (Th) subset. (D) Cytokine production and (E) pie chart representing the multifunctional SARS-  
 858 CoV-2-specific CD4<sup>+</sup> T cell response assessed by intracellular cytokine staining after  
 859 incubation with SARS-CoV-2 peptides compared to unstimulated control. Statistical  
 860 comparisons were performed by Kruskal-Wallis test (B) and Wilcoxon Rank Sum test (F). p<  
 861 0.05, \*\*p < 0.01, \*\*\*p < 0.001, \*\*\*\*p<0.0001. S1: subunit 1 of spike protein; M: membrane  
 862 protein; N: nucleocapsid protein.

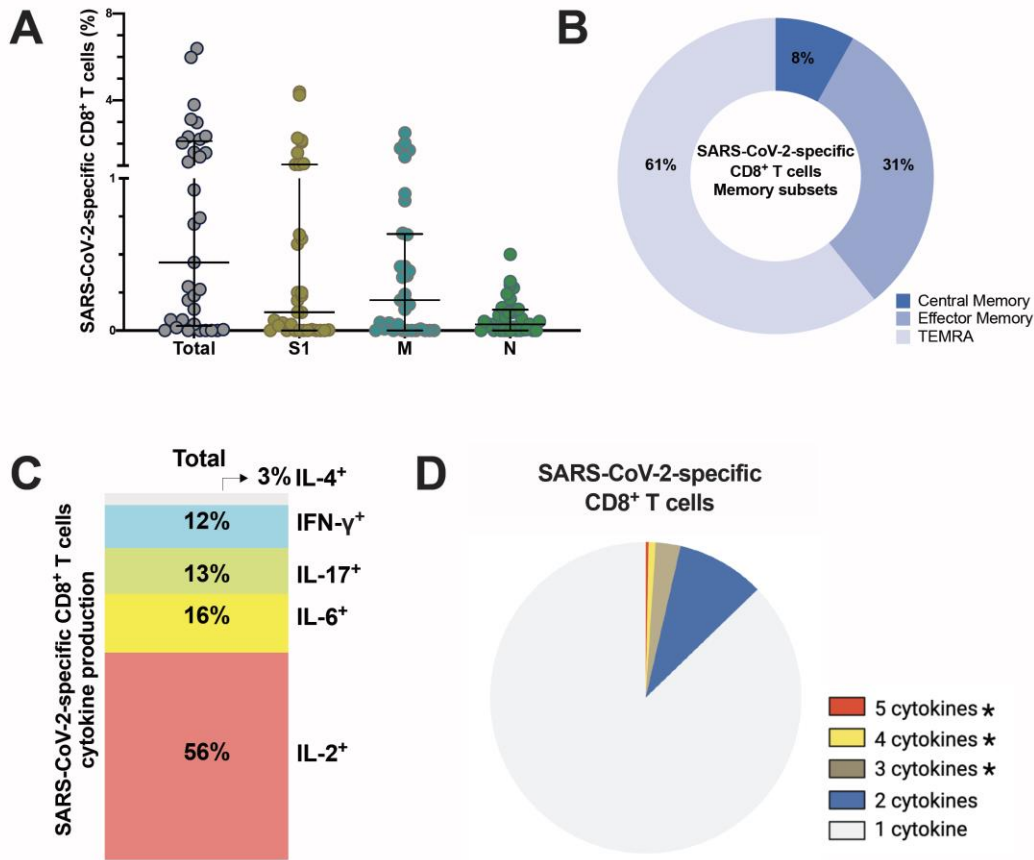

863

864 **Figure 5. SARS-CoV-2-specific CD8<sup>+</sup> T cells 6-9 months post-infection.** (A) Frequency  
 865 (percentage of CD8<sup>+</sup> T cells) of total SARS-CoV-2-specific CD8<sup>+</sup> T cells after overnight  
 866 stimulation with S, M and N peptide pools as assessed by induced expression of CD69 and  
 867 CD137. Each dot represents result of a single individual (n=33). Lines represent median and  
 868 IQR, n=33. (B) Distribution of SARS-CoV-2-specific CD8<sup>+</sup> T cells among central memory,  
 869 effector memory, and terminally differentiated effector memory cells (TEMRA). (C) Cytokine  
 870 production and (D) pie chart representing the multifunctional CD8<sup>+</sup> T of SARS-Cov-2-specific  
 871 T cells assessed by intracellular cytokine staining after incubation with SARS-CoV-2 peptides  
 872 compared to unstimulated control. Statistical comparisons were performed by (A) Kruskal-  
 873 Wallis test and (D) Wilcoxon Rank Sum test. \*p < 0.05, \*\*p < 0.01, \*\*\*p < 0.001. S1: subunit  
 874 1 of spike protein; M: membrane protein; N: nucleocapsid protein.

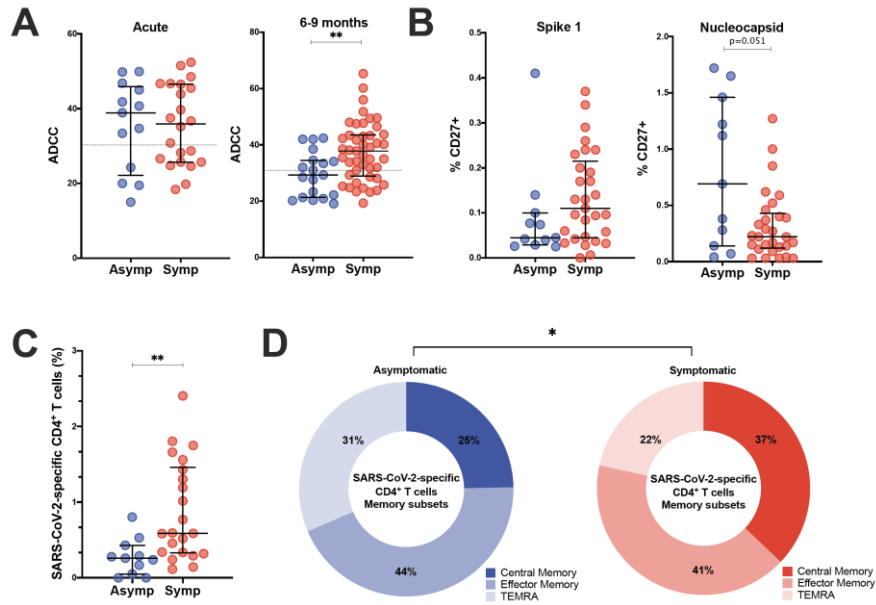

875

876 **Figure 6. Comparison of adaptive immunity in asymptomatic and symptomatic**

877 **individuals.** (A). Comparisons of ADCC activity in asymptomatic (asyp; n=12) versus

878 symptomatic (symp; n=20) individuals in the acute phase and 6-9 months after confirmed

879 infection using 293T-spike cells as target cell. Percentage of CD107a positive cells is measured

880 as readout for ADCC. (B) Comparison of percentages of S1-specific or N-specific memory B

881 cells (CD19<sup>+</sup>CD27<sup>+</sup>) between 11 asymptomatic individuals and 29 symptomatic individuals.

882 (C) Frequency (percentage of CD4<sup>+</sup> T cells) of total SARS-CoV-2-specific CD4<sup>+</sup> T cells after

883 overnight stimulation with peptide pools comparing asymptomatic individuals (asyp; n=11)

884 with symptomatic patients (symp; n=22). (D) Comparison of CD4<sup>+</sup> T cell memory phenotype

885 between asymptomatic individuals (asyp; n=11) and symptomatic patients (symp; n=22).

886 Statistical comparisons were performed by (A, B and C) Mann Whitney tests and (D) Chi-

887 square test for trend \*p<0.05, \*\*p<0.01.

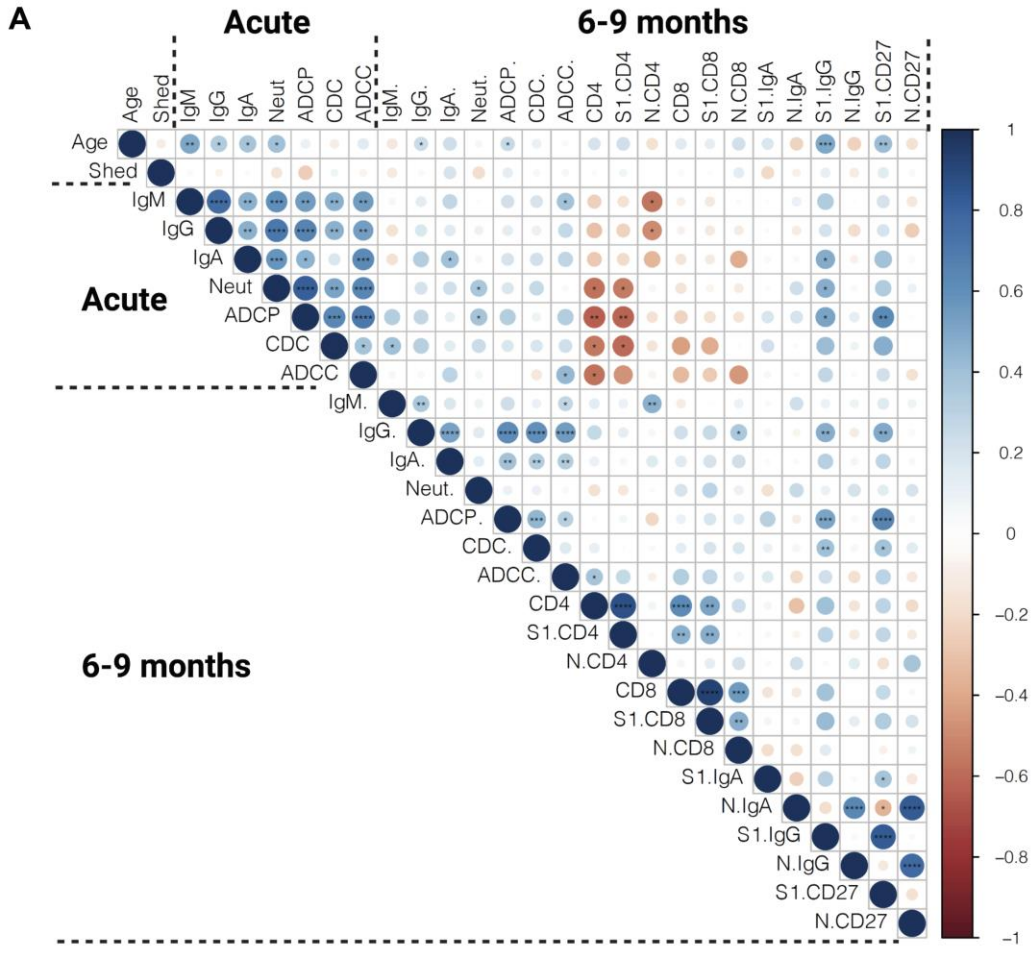

888

889 **Figure 7. Spearman correlation matrix.** Humoral immunity and effector functions measured  
 890 in the acute phase and 6-9 months post infection were correlated to each other and to frequencies  
 891 of antigen-specific B and T cells measured 6-9 months after infection. Red represents a negative  
 892 correlation between two variables and blue indicates a positive correlation. The size of the dot  
 893 represents the magnitude of the correlation coefficient. Statistical analysis was performed with  
 894 spearman correlation test. \* $p < 0.05$ , \*\* $p < 0.01$ , \*\*\* $p < 0.001$ , \*\*\*\* $p < 0.001$ .



## 1 Supplementary Material

**A**

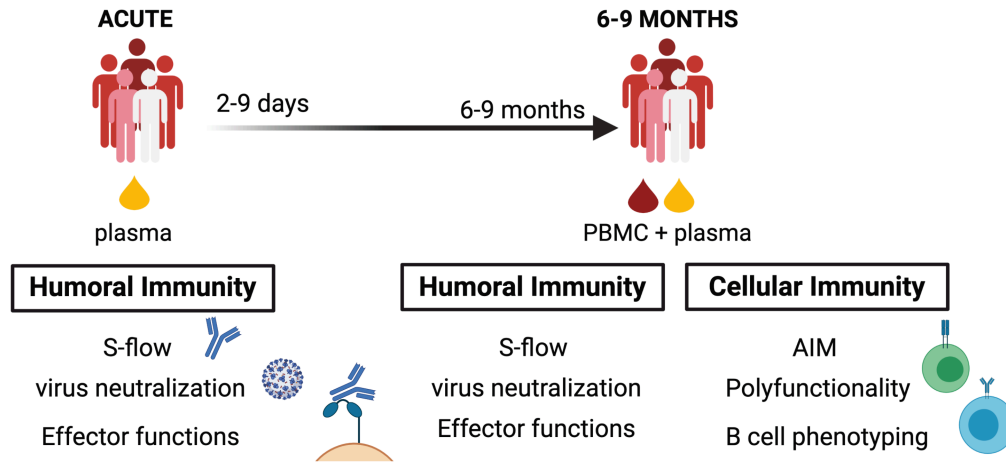

**B**

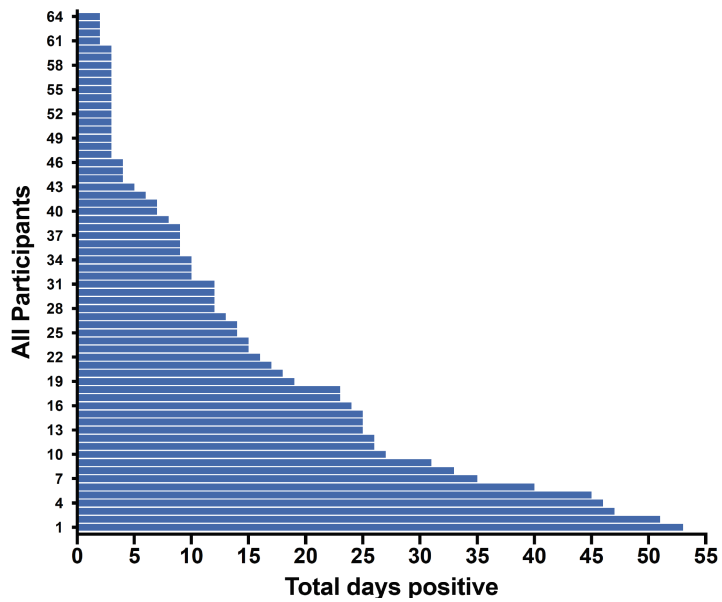

2

3 **Figure S1. Characterization of the cohort**

4 (A) Graphical summary of the assays performed on samples of the different time points. (B)

5 Length of RNA shedding in the patients.

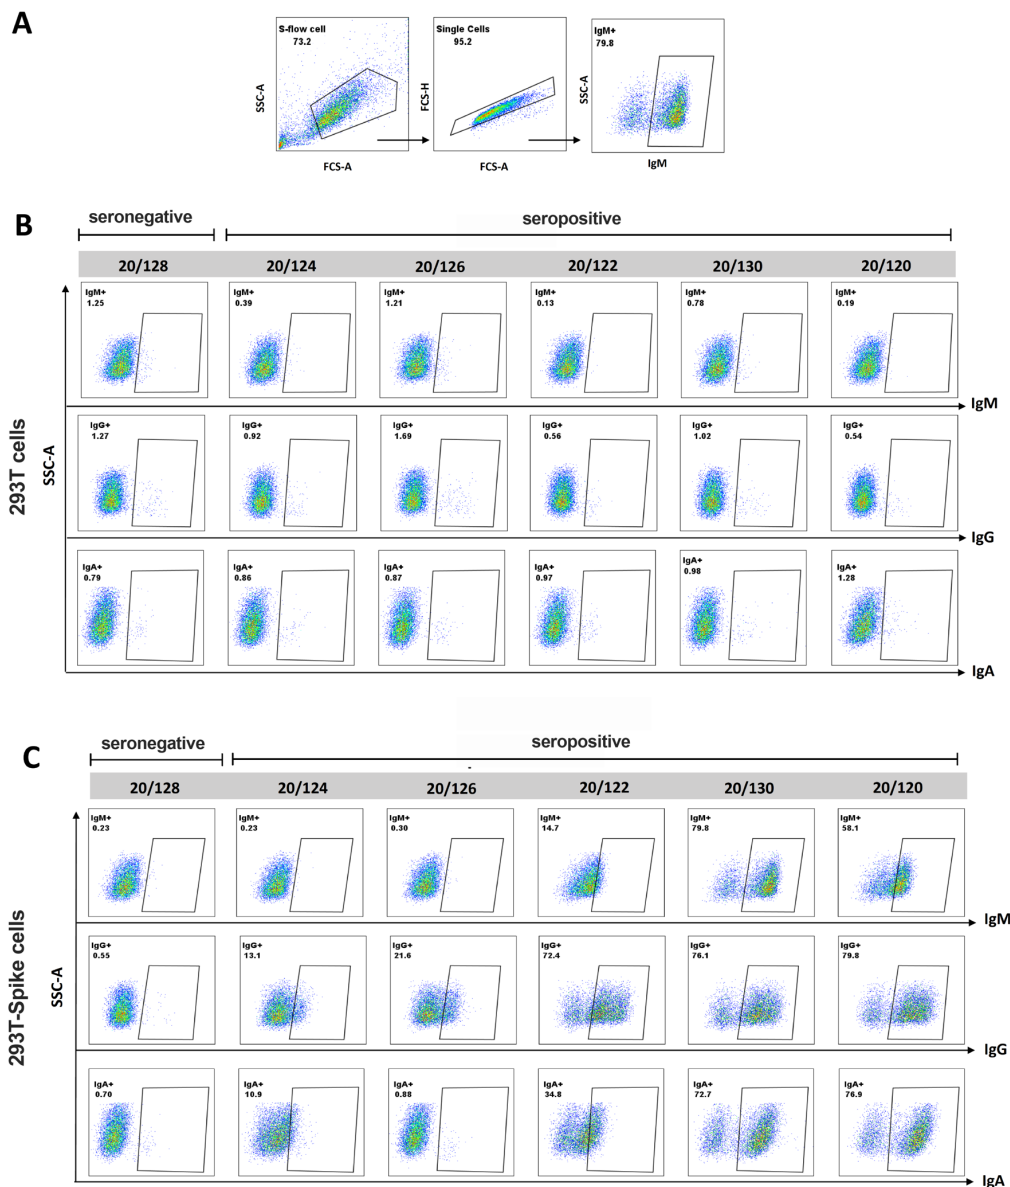

6

7 **Figure S2. Measurement of anti-S-binding antibodies using S-Flow.**

8 (A) Representative gating strategy (B-C) Percentages of spike-binding Ig were measured in  
 9 plasma as percentage of cells, which are positive for anti-IgM, anti-IgG or anti-IgA. Specific  
 10 binding was calculated as  $100 \times (\% \text{ binding on S-expressing 293T cells} - \% \text{ binding on 293T}$   
 11  $\text{control cells}) / (100 - \% \text{ of binding to 293T control cells})$ . Graph shows data from triplicate testing  
 12 of the COVID-19 reference plasma panel (NIBSC 20/120, 20/124, 20/124, 20/126, 20/128,  
 13 20/130) obtained from the NIBSC.

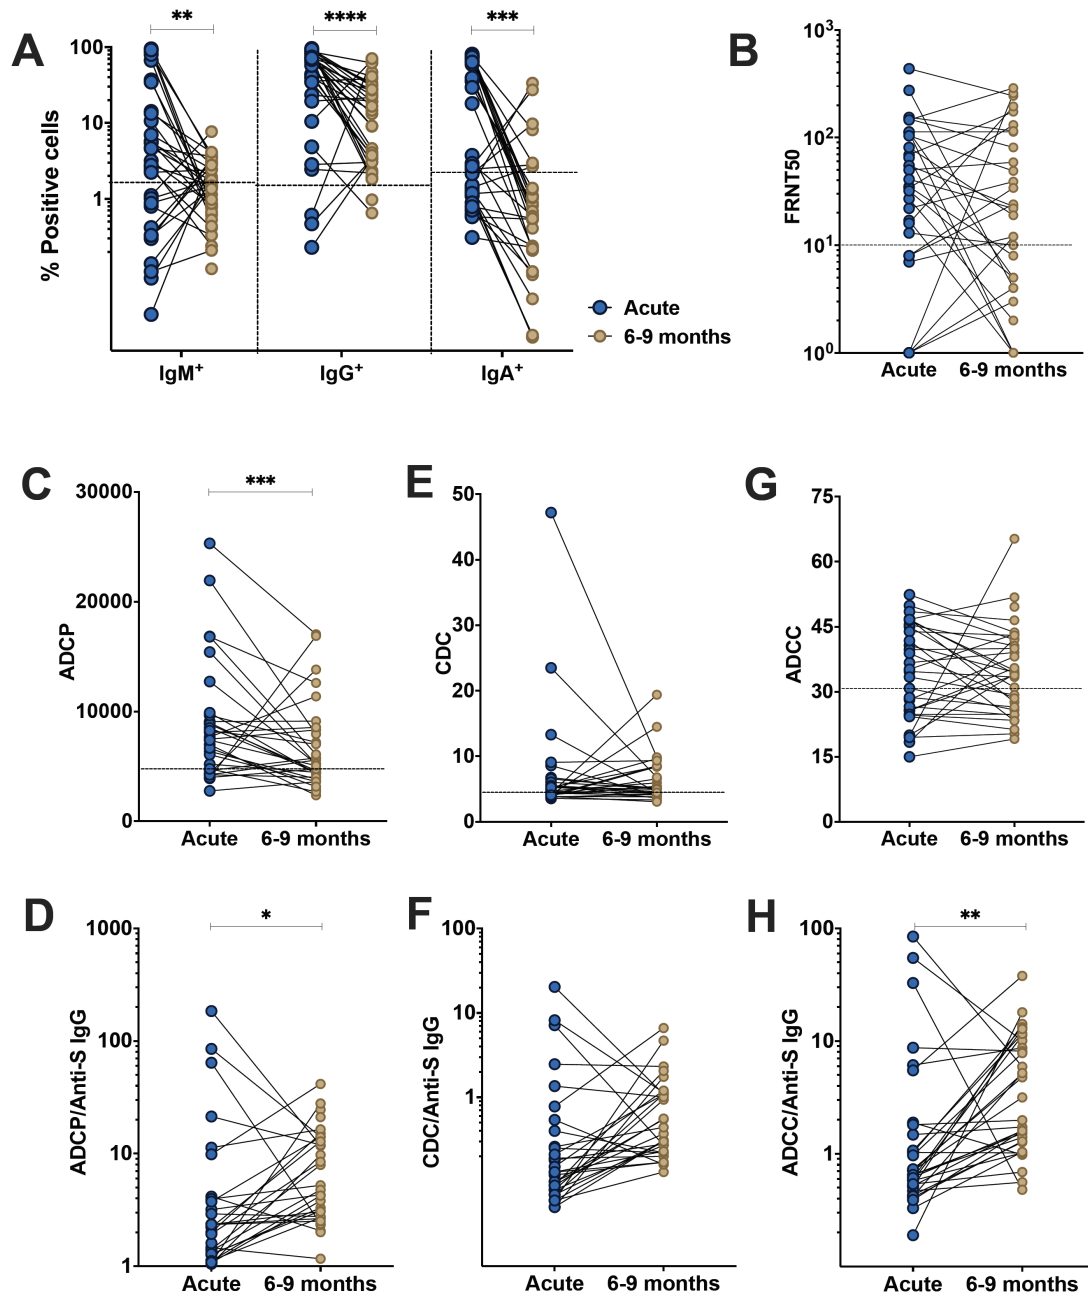

15 **Figure S3. Analysis of antibody features in paired patient samples**

16 Individuals were sampled 2-9 days post laboratory confirmation and 6-9 months later. **(A)**  
17 Amount of antibodies against spike protein were reported as percentage of spike-expressing  
18 293T cells bound by IgM, IgG, IgA in the S-Flow assay. **(B)** SARS-CoV-2 neutralizing activity  
19 was calculated as FRNT50 titer in foci reduction neutralization test. **(C)** Comparison of ADCP  
20 activity in SARS-CoV-2-infected individuals in the acute phase of infection and 6-9 months  
21 post-infection. **(D)** Ratio of ADCP to anti-spike IgG measured by S-Flow. **(E)** Comparison of  
22 CDC activity in SARS-CoV-2-infected individuals in the acute phase of infection and 6-9  
23 months post infection. **(F)** Ratio of CDC to anti-spike IgG measured by S-Flow. **(G)**  
24 Comparison of ADCC activity in SARS-CoV-2-infected individuals in the acute phase of  
25 infection and 6-9 months post infection. **(H)** Ratio of ADCC to anti-spike IgG measured by S-  
26 Flow. Statistical comparisons were performed by Wilcoxon test. The dashed line indicates the  
27 cutoff for positivity based on values calculated following formula: cut-off = % mean positive  
28 cells from 19 pre-pandemic samples + 3x standard deviation. Each dot represents result from a  
29 single individual. Lines represent median and IQR. Each dot represents one individual. Lines  
30 represent median and IQR. \*p < 0.05, \*\*p < 0.01, \*\*\*p < 0.001, and \*\*\*\*p < 0.0001.  
31 IgM/IgA/IgG antibody: n=33, Neutralization: n= 33, ADCP: n=30, CDC: n=30, ADCC n=32.

32

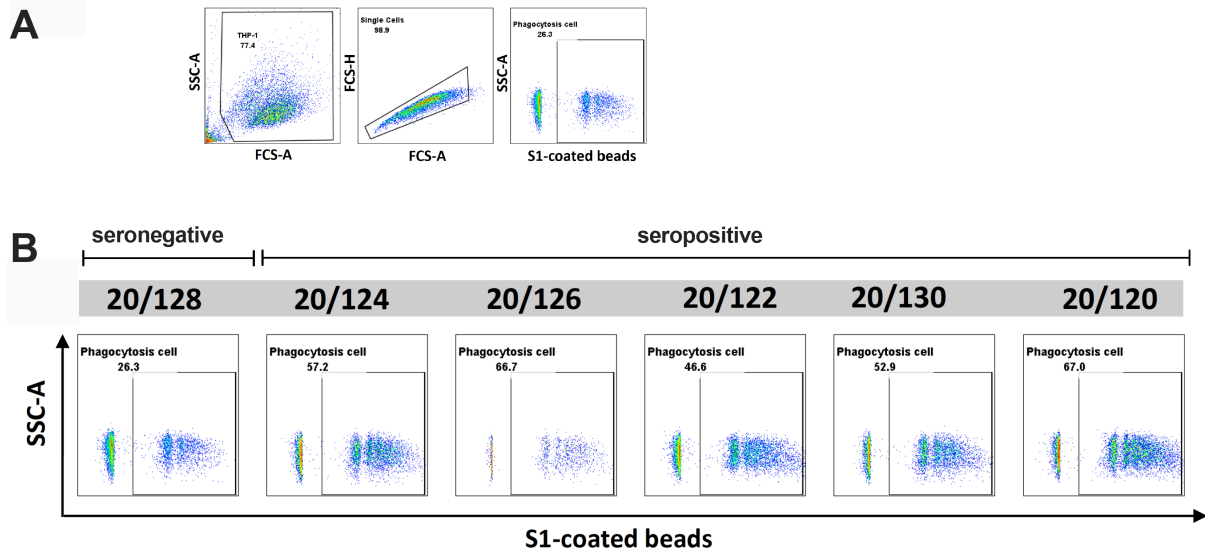

33

34 **Figure S4. Antibody-dependent cellular phagocytosis (ADCP) assay**

35 Quantification of the S1-coated beads engulfed by THP-1 cells. (A) Representative gating

36 strategy. (B) ADCP was defined by the percentages of THP-1 cells which are positive for FITC-

37 neutravidin beads coated with biotinylated S1 protein. Representative ADCP assay using the

38 COVID-19 reference plasma panel (NIBSC 20/120, 20/124, 20/124, 20/126, 20/128, 20/130)

39 obtained from the NIBSC. The ADCP activity represents the integrate mean fluorescence

40 intensity (iMFI) value (% positive fluorescence THP-1 cells x MFI of the positive fluorescence

41 THP-1 cells). The experiment was performed in duplicate.

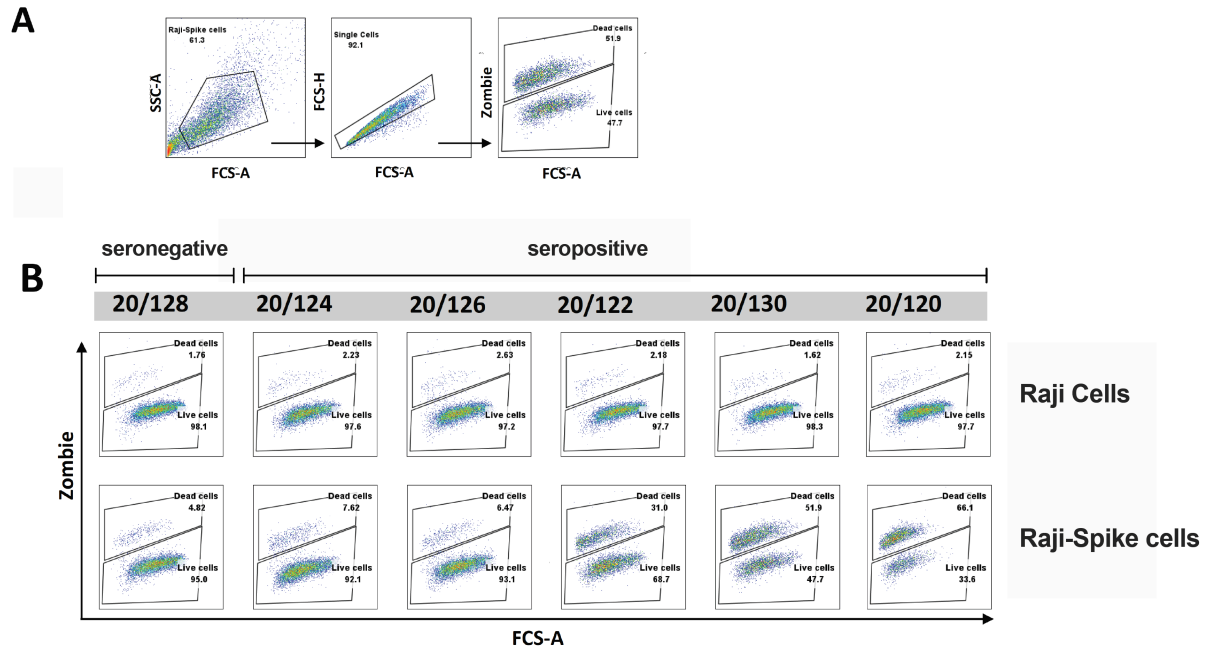

42

### 43 **Figure S5. Complement-dependent cytotoxicity (CDC) assay**

44 SARS-CoV-2 plasma induces C3 deposition and cell death in spike-expressing Raji cells. (A)

45 Representative gating strategy. (B) CDC assay was performed by using pike-expressing Raji

46 cells as target cells, serum (pooled from 3 healthy donors) as complement source and heat-

47 inactivated plasma from SARS-CoV-2 patients or from reference panel as antibody source.

48 CDC activity was measured as the percentage of C3<sup>+</sup>Zombie<sup>+</sup> pike-expressing Raji cells after

49 incubation with plasma dead and complement. Representative CDC assay using the COVID-19

50 reference plasma panel (NIBSC 20/120, 20/124, 20/124, 20/126, 20/128, 20/130) obtained from

51 the NIBSC. Complement-induced cell death was calculated as percentage of C3<sup>+</sup> dead cells of

52 total cells using spike-expressing Raji cells as target cell. The experiment was performed in

53 duplicate.

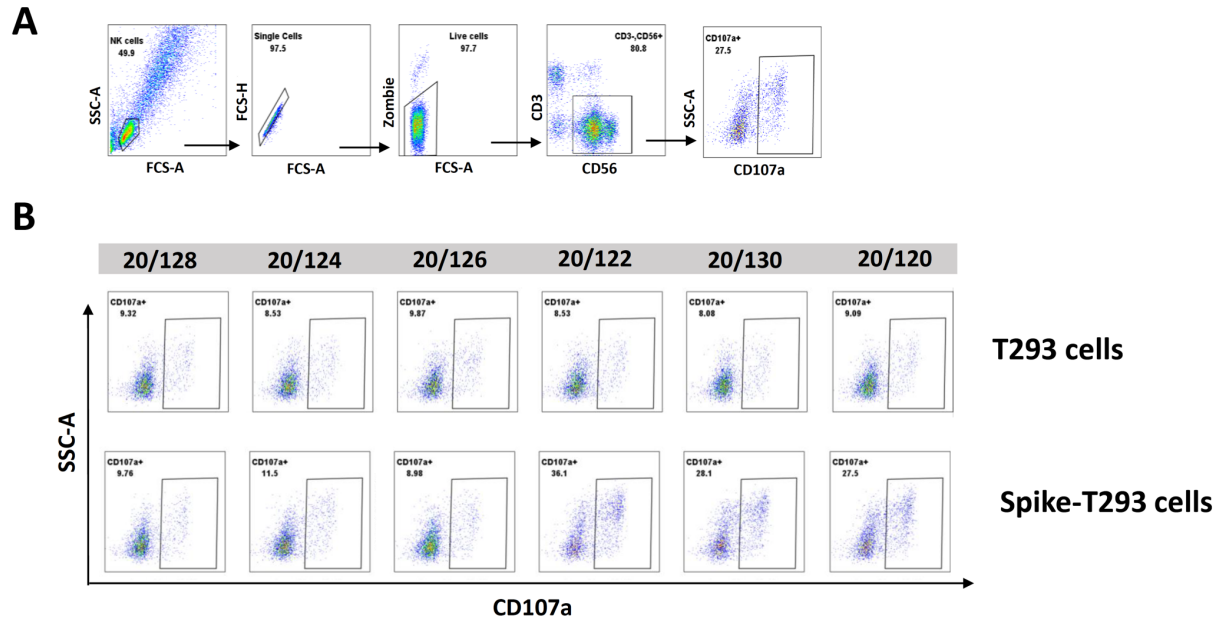

54

55 **Figure S6. Antibody-dependent cellular cytotoxicity (ADCC) assay. (A).** Representative  
56 gating strategy. NK cells were identified by lymphocyte morphology, singlet, live cell and CD3<sup>-</sup>  
57 CD56<sup>+</sup>. The ADCC activity was defined based on NK cell degranulation (CD107<sup>+</sup>). **(B-C)**  
58 ADCC activity of NK cells induced by incubation with COVID-19 reference plasma panel  
59 (NIBSC 20/120, 20/124, 20/124, 20/126, 20/128, 20/130) obtained from the NIBSC in the  
60 presence of 293T-spike cells or 293T control cells. The experiment was performed in duplicate.

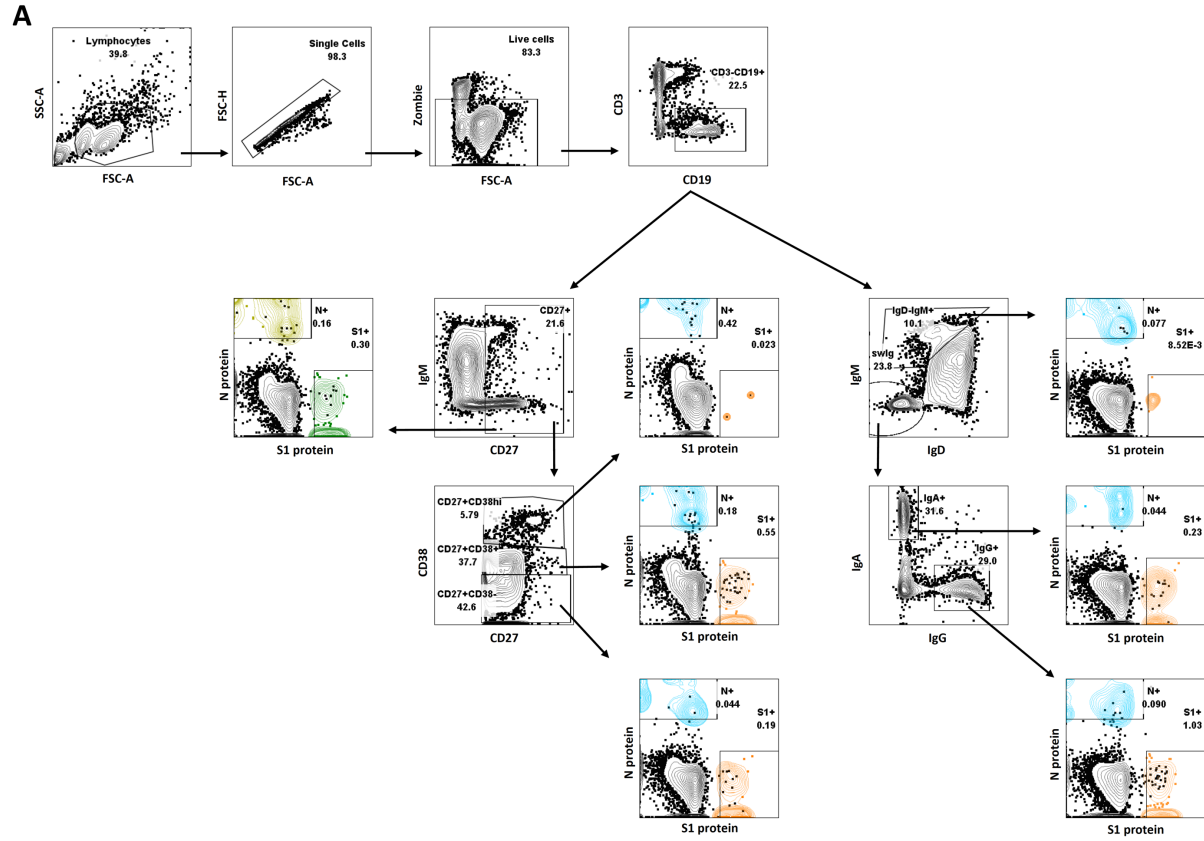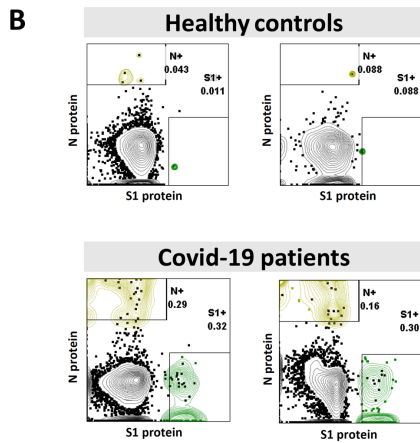



62 **Figure S7. Representative gating strategy used to define antigen-specific B cells.**

63 (A) B cells were defined from the gates of morphology of lymphocytes, singlets, viability and  
64 CD3<sup>-</sup>CD19<sup>+</sup>. (B). Total B cells (CD19<sup>+</sup>) were further gated for B cell subsets including resting  
65 memory B cells (CD27<sup>+</sup>CD38<sup>-</sup>), activated memory B cells (CD27<sup>+</sup>CD38<sup>+</sup>) and plasma blasts  
66 (CD27<sup>+</sup>CD38<sup>hi</sup>). S1-specific B cells and N-specific B cells were determined. (C) Total B cells  
67 (CD19<sup>+</sup>) were further gated for B cell classes including non-class-switched mature cells (IgD<sup>-</sup>  
68 IgM<sup>+</sup>) and class-switched IgM<sup>-</sup>IgD<sup>-</sup>IgA<sup>+</sup> and IgM<sup>-</sup>IgD<sup>-</sup>IgG<sup>+</sup> cells. The S1-specific B cells and  
69 N-specific B cells were determined. (D) Representative image comparing S1- and N-specific B  
70 cells in healthy controls and SARS-CoV-2-infected patients 6-9 months post infection.

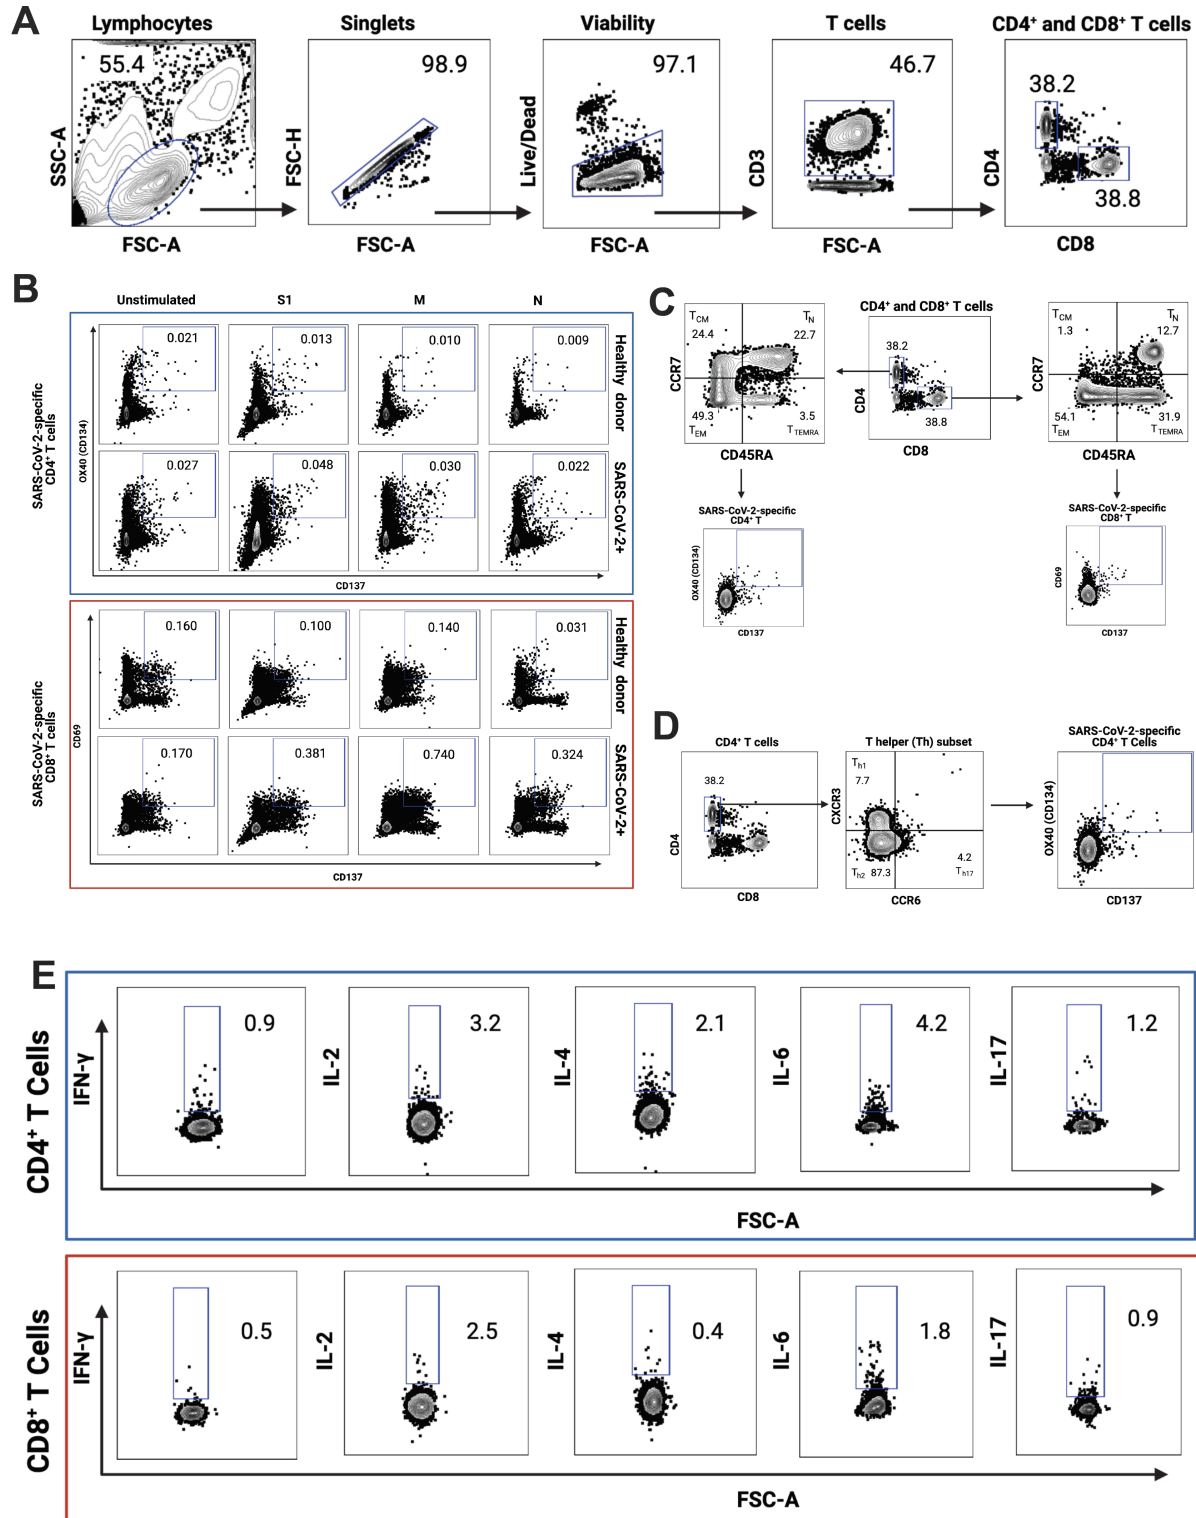

72 **Figure S8. Representative gating strategy used for the T cells assays. (A)** T cells were  
73 defined from the gates of morphology of lymphocytes, singlets, viability and CD3<sup>+</sup>. **(B)** Gating  
74 strategy used in the CD4<sup>+</sup> and CD8<sup>+</sup> T cell activation induced marker (AIM) assay to assess the  
75 SARS-CoV-2-specific CD4<sup>+</sup> and CD8<sup>+</sup> T cells after overnight stimulation with S, M and N  
76 peptide pools. Representative image comparing S-, M- and N-specific CD4<sup>+</sup> and CD8<sup>+</sup> T cells  
77 in a healthy control and a SARS-CoV-2-infected patient 6-9 months post infection. **(C)** Gating  
78 strategy used in the CD4<sup>+</sup> and CD8<sup>+</sup> T cell activation induced marker (AIM) assay to assess the  
79 SARS-CoV-2-specific memory CD4<sup>+</sup> and CD8<sup>+</sup> T cell subsets. Distribution of central memory  
80 (TCM), effector memory (TEM), and terminally differentiated effector memory cells  
81 (TEMRA) among total SARS-CoV-2-specific T cells. **(D)** Gating strategy used in the CD4<sup>+</sup> T  
82 cell activation induced marker (AIM) assay to assess SARS-CoV-2-specific T helper (Th)  
83 subsets. **(E)** Gating strategy used in the CD4<sup>+</sup> and CD8<sup>+</sup> T cell intracellular staining assay to  
84 assess the cellular cytokine profile after 6 hours stimulation with S, M and N peptide pools.

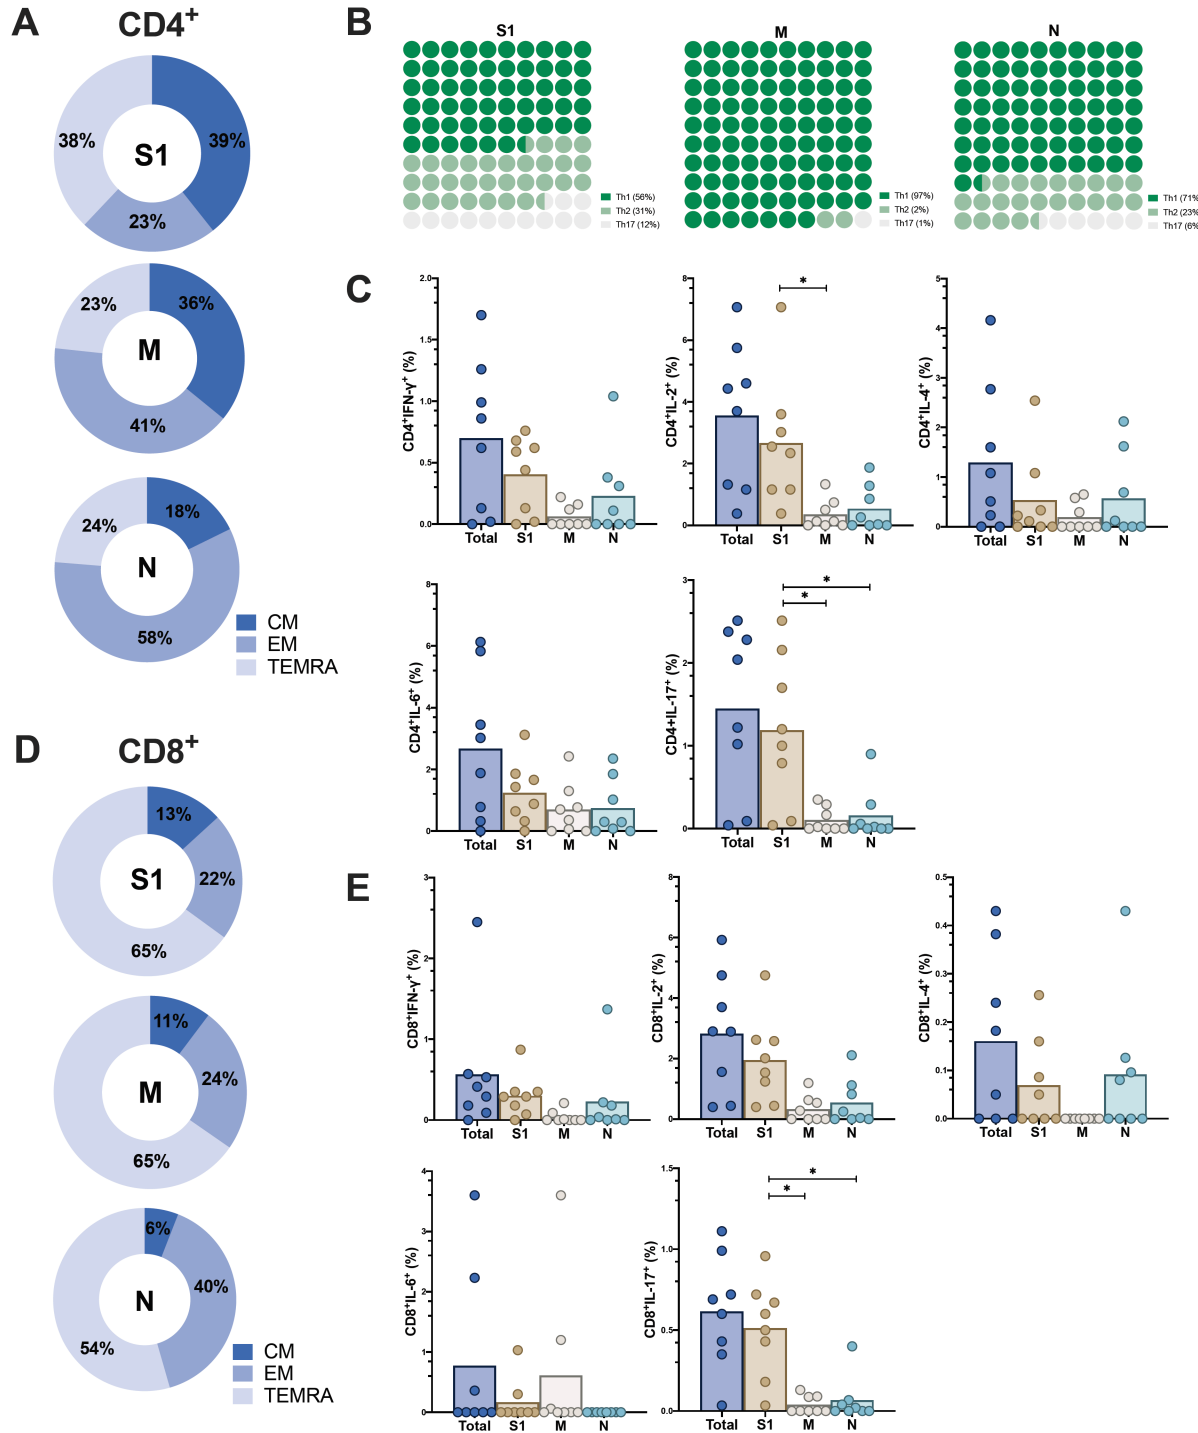

86 **Figure S9. Characterization of SARS-CoV-2-specific T Cells.** (A) Distribution of central  
87 memory (TCM), effector memory (TEM), and terminally differentiated effector memory cells  
88 (TEMRA) CD4<sup>+</sup> T cells targeting different proteins of SARS-CoV-2 after overnight stimulation  
89 with different peptide pools. (B) The CD4<sup>+</sup> Th differentiation, targeting different proteins of  
90 SARS-CoV-2, after overnight stimulation with different peptide pools. (C) Cytokine profile of  
91 CD4<sup>+</sup> T cells after 6 hours stimulation with S, M and N peptide pools. (D) Distribution of central  
92 memory (TCM), effector memory (TEM), and terminally differentiated effector memory cells  
93 (TEMRA) CD8<sup>+</sup> T cells targeting different proteins of SARS-CoV-2, after overnight  
94 stimulation with different peptide pools. (E) Cytokine profile of CD8<sup>+</sup> T cells after 6 hours  
95 stimulation with S, M and N peptide pools.

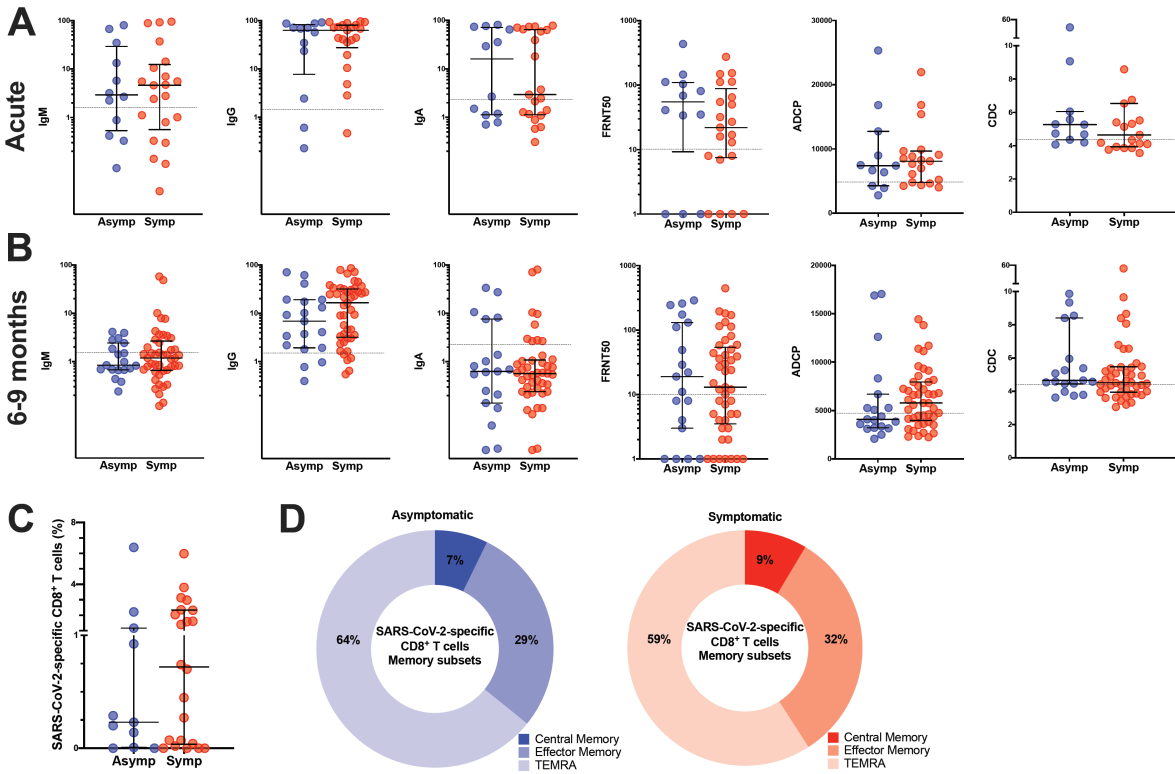

96

97 **Figure S10. Comparison of immune parameters in asymptomatic and symptomatic**

98 **individuals.** Comparison of anti-S antibody titers, FRNT50 titers and anti-S mediated effector

99 functions in the **(A)** acute phase and **(B)** late convalescent phase after infection. **(C)** Comparison

100 of the frequency of total SARS-CoV-2-specific CD8<sup>+</sup> T cells after overnight stimulation with

101 peptide pools in asymptomatic individuals (asyp; n=11) and symptomatic patients (symp;

102 n=22) at late convalescence. **(D)** Comparison of CD8<sup>+</sup> T cell memory phenotype between

103 asymptomatic individuals (asyp; n=11) and symptomatic patients (symp; n=22).

104 **Table S1:** Cohort description.

|                                                                                    | SARS-CoV-2-infected patients (n=64) |
|------------------------------------------------------------------------------------|-------------------------------------|
| Age (y), median (min-max, IQR)                                                     | 36 (12-75, 18.5)                    |
| Sex (%)                                                                            |                                     |
| <i>Male</i>                                                                        | 55 (86)                             |
| <i>Female</i>                                                                      | 9 (14)                              |
| <i>Smoker (%)</i>                                                                  | 8 (13)                              |
| <i>Comorbidities (%)</i>                                                           |                                     |
| Diabetes                                                                           | 2 (3)                               |
| High blood pressure                                                                | 7 (11)                              |
| <i>Clinical spectrum (%)</i>                                                       |                                     |
| Asymptomatic                                                                       | 19 (30)                             |
| Symptomatic                                                                        | 45 (70)                             |
| <i>Dysosmia and dysgeusia</i>                                                      | 15 (23)                             |
| <i>Dyspnea</i>                                                                     | 16 (25)                             |
| <i>Fever</i>                                                                       | 23 (36)                             |
| <i>Cough or sore throat or running nose</i>                                        | 35 (55)                             |
| <i>Days from SARS-CoV-2 positive RT-PCR to sample collection, median (min-max)</i> |                                     |
| Acute                                                                              | 5 (2-9)                             |
| 6-9 months                                                                         | 203 (166-258)                       |
| <i>Time of SARS-CoV-2 RNA shedding (%)</i>                                         |                                     |
| < 10 days positive                                                                 | 30 (47)                             |
| ≥ 10 days positive                                                                 | 34 (53)                             |

105

106 **Table S2:** Monoclonal antibody list.

| <b>Marker</b> | <b>Fluorochrome</b> | <b>Supplier</b>        | <b>Catalog N.</b> |
|---------------|---------------------|------------------------|-------------------|
| C3/C3b/iC3b   | APC                 | Cedarlane              | CL7503APC         |
| CCR6          | BB515               | BD Biosciences         | 564479            |
| CCR7          | APC                 | Biolegend              | 353214            |
| CD107a        | APC                 | BD Biosciences         | 560664            |
| CD134         | BB700               | BD Biosciences         | 566559            |
| CD137         | PE-Cy7              | Biolegend              | 309818            |
| CD138         | BV785               | Biolegend              | 356538            |
| CD19          | APC/Cy7             | Biolegend              | 302218            |
| CD27          | PerCP/Cy5.5         | Biolegend              | 356408            |
| CD3           | BUV395              | BD Biosciences         | 564001            |
| CD3           | Per-Cp5-5           | Biolegend              | 317336            |
| CD38          | BV 605              | Biolegend              | 303532            |
| CD4           | BUV496              | BD Biosciences         | 612936            |
| CD45RA        | BV421               | Biolegend              | 304130            |
| CD56          | BV421               | Biolegend              | 362552            |
| CD69          | BV786               | Biolegend              | 310932            |
| CD69          | PE-Cy7              | Biolegend              | 310912            |
| CD8           | AF700               | Biolegend              | 344724            |
| CD8           | APC-H7              | BD Biosciences         | 560179            |
| CXCR3         | BV711               | Biolegend              | 353732            |
| IFN- $\gamma$ | BV605               | Biolegend              | 502536            |
| IFN- $\gamma$ | PE                  | Biolegend              | 506507            |
| IgA           | APC                 | Miltenyi Biotec        | 130-113-472       |
| IgA           | AF 647              | Jackson ImmunoResearch | 109-605-011       |
| IgD           | BV711               | BD Biosciences         | 740794            |
| IgG           | APC                 | Life technology        | A21445            |
| IgG           | FITC                | Biolegend              | 410720            |
| IgM           | PE                  | Biolegend              | 314508            |
| IgM           | BV421               | Biolegend              | 314515            |
| IL-17         | BV711               | Biolegend              | 512328            |
| IL-2          | PerCP/Cy.5          | Biolegend              | 500322            |
| IL-4          | BUV737              | BD Biosciences         | 612835            |
| IL-6          | PE                  | Biolegend              | 501107            |
| TNF- $\alpha$ | APC-Cy7             | Biolegend              | 502944            |

107



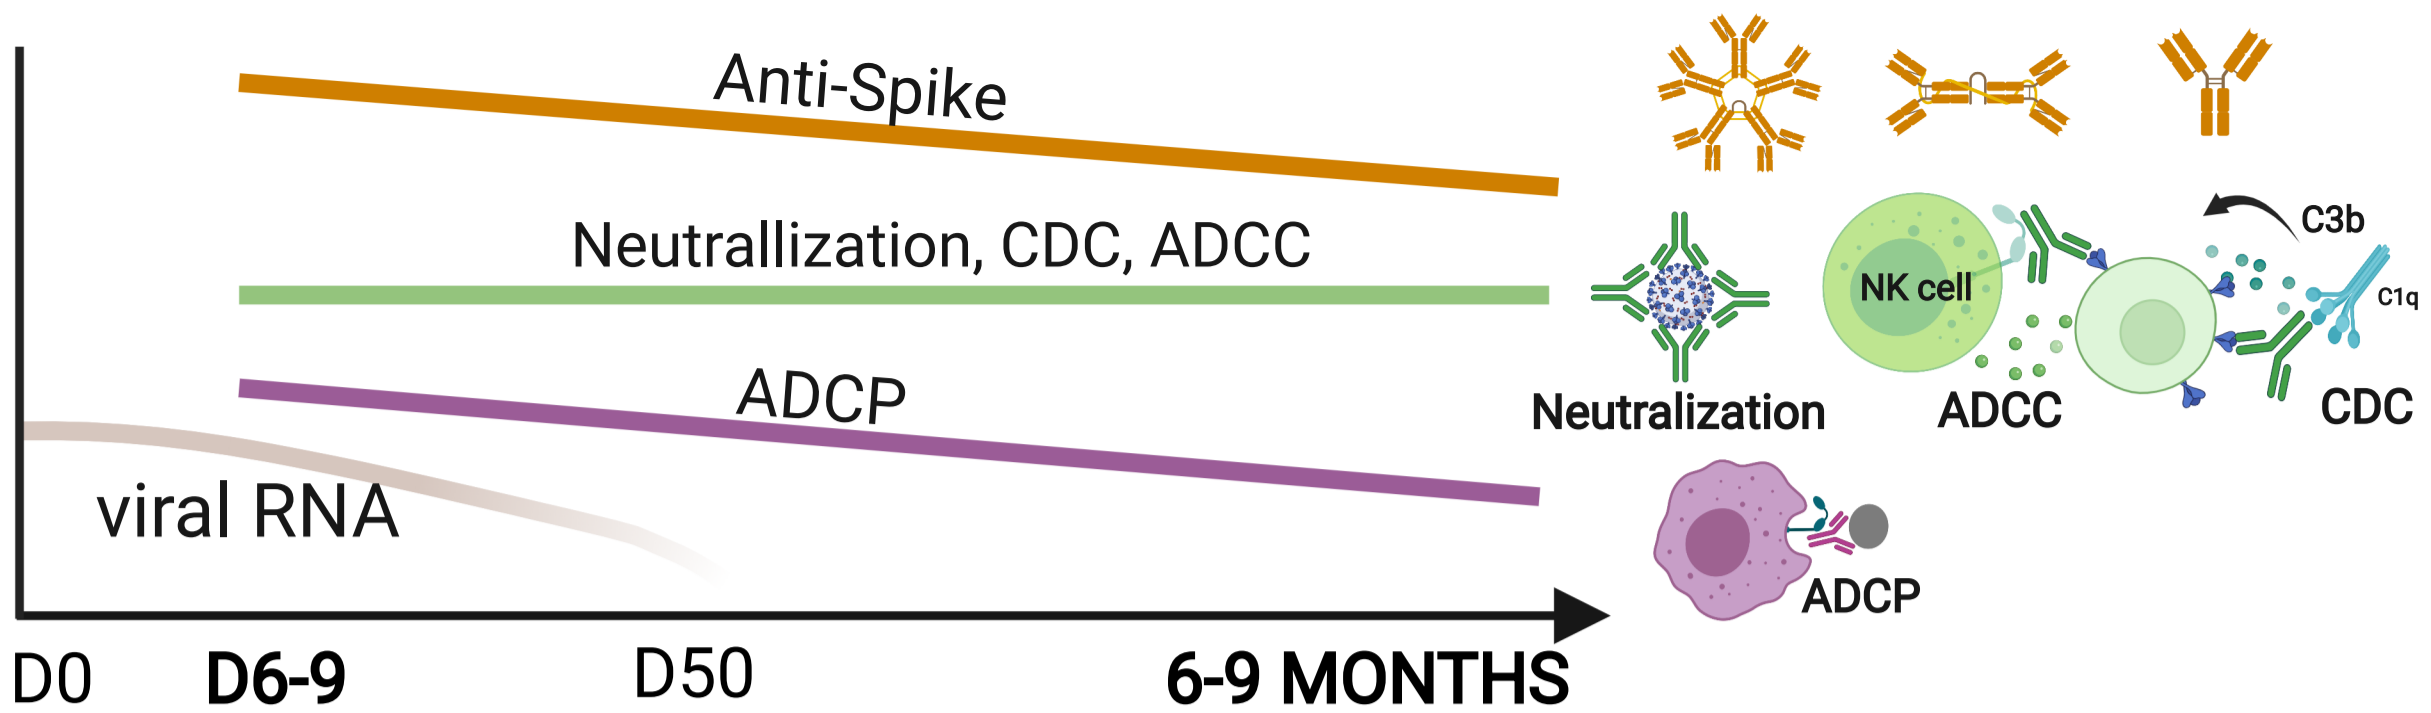

bioRxiv preprint doi: <https://doi.org/10.1101/2021.08.12.455901>; this version posted August 12, 2021. The copyright holder for this preprint (which was not certified by peer review) is the author/funder, who has granted bioRxiv a license to display the preprint in perpetuity. It is made available under aCC-BY-ND 4.0 International license.

**6-9 MONTHS**

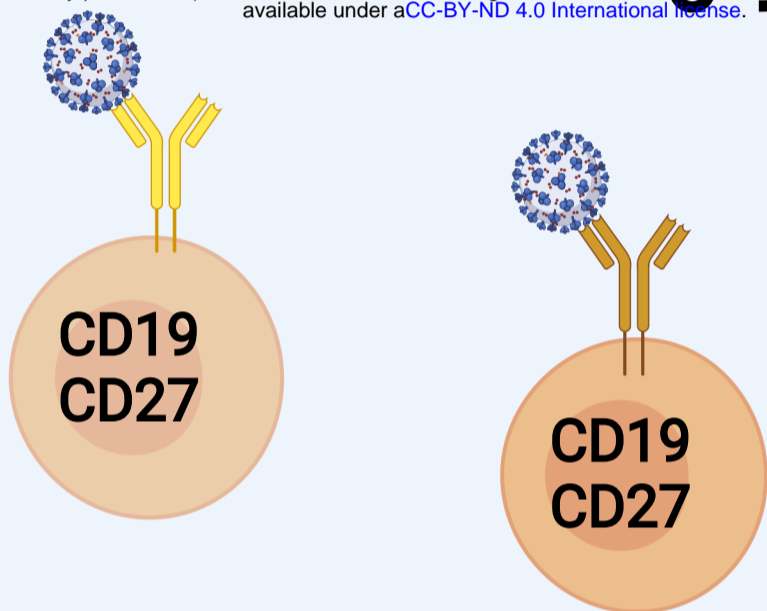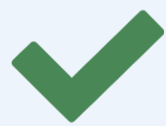

**Virus-specific B cells**

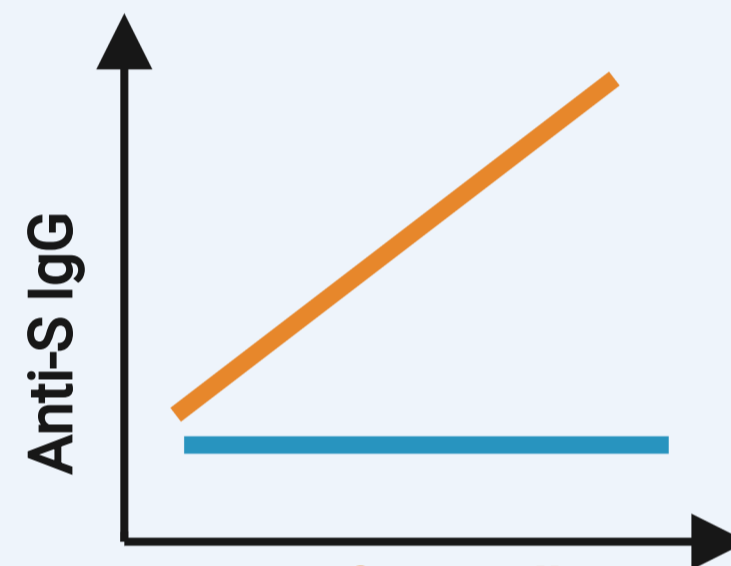

**S1-specific B cells**

**S1-specific CD4 T cells**

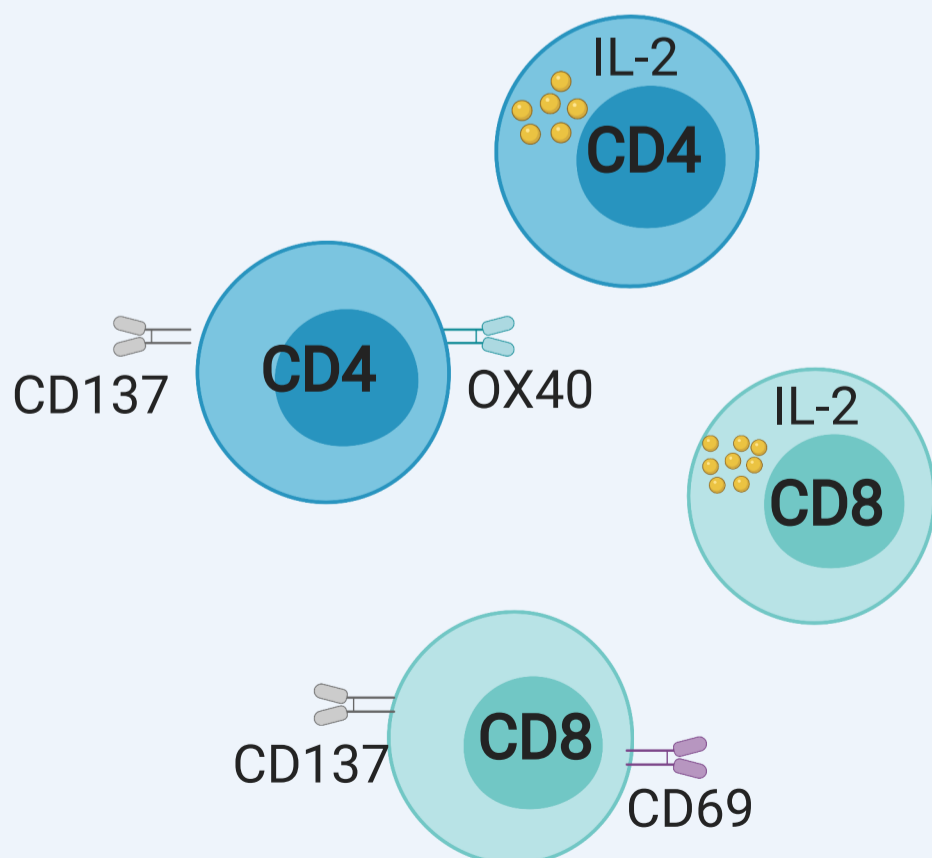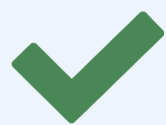

**Virus-specific T cells**

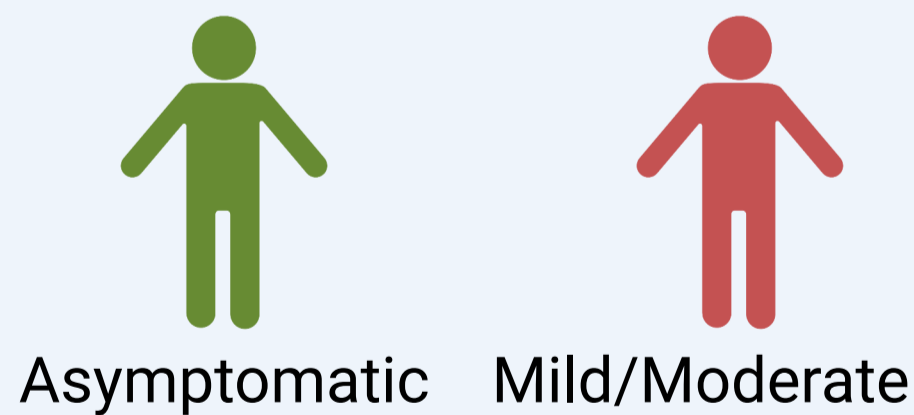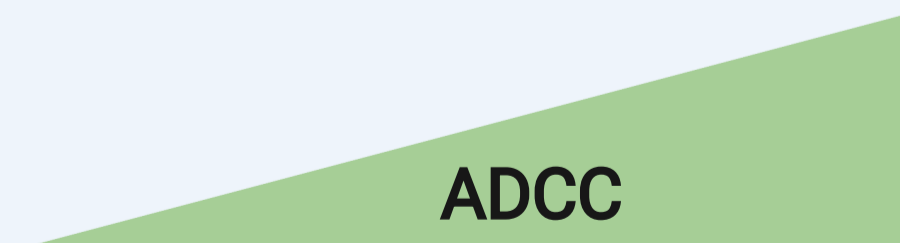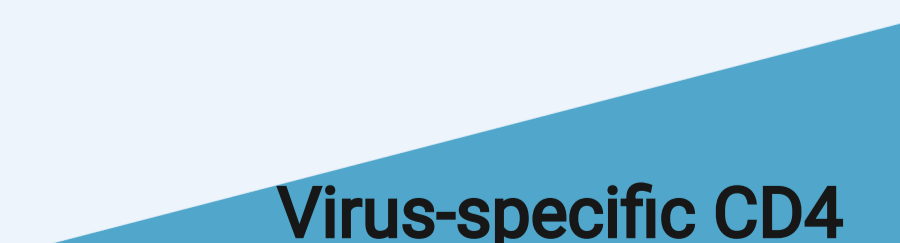

Source: https://www.biorxiv.org/content/10.1101/2021.08.12.455901v1.full.pdf
